# Supplementary figures and images for: Silver(i)-promoted oxidative cyclisation to pyrrolo[2,1-a]isoquinolines and application to the synthesis of (±)-crispine A
Source: Royal Society of Chemistry journal article supplement (doi:10.1039/c2ra22823h), 2012-11-15

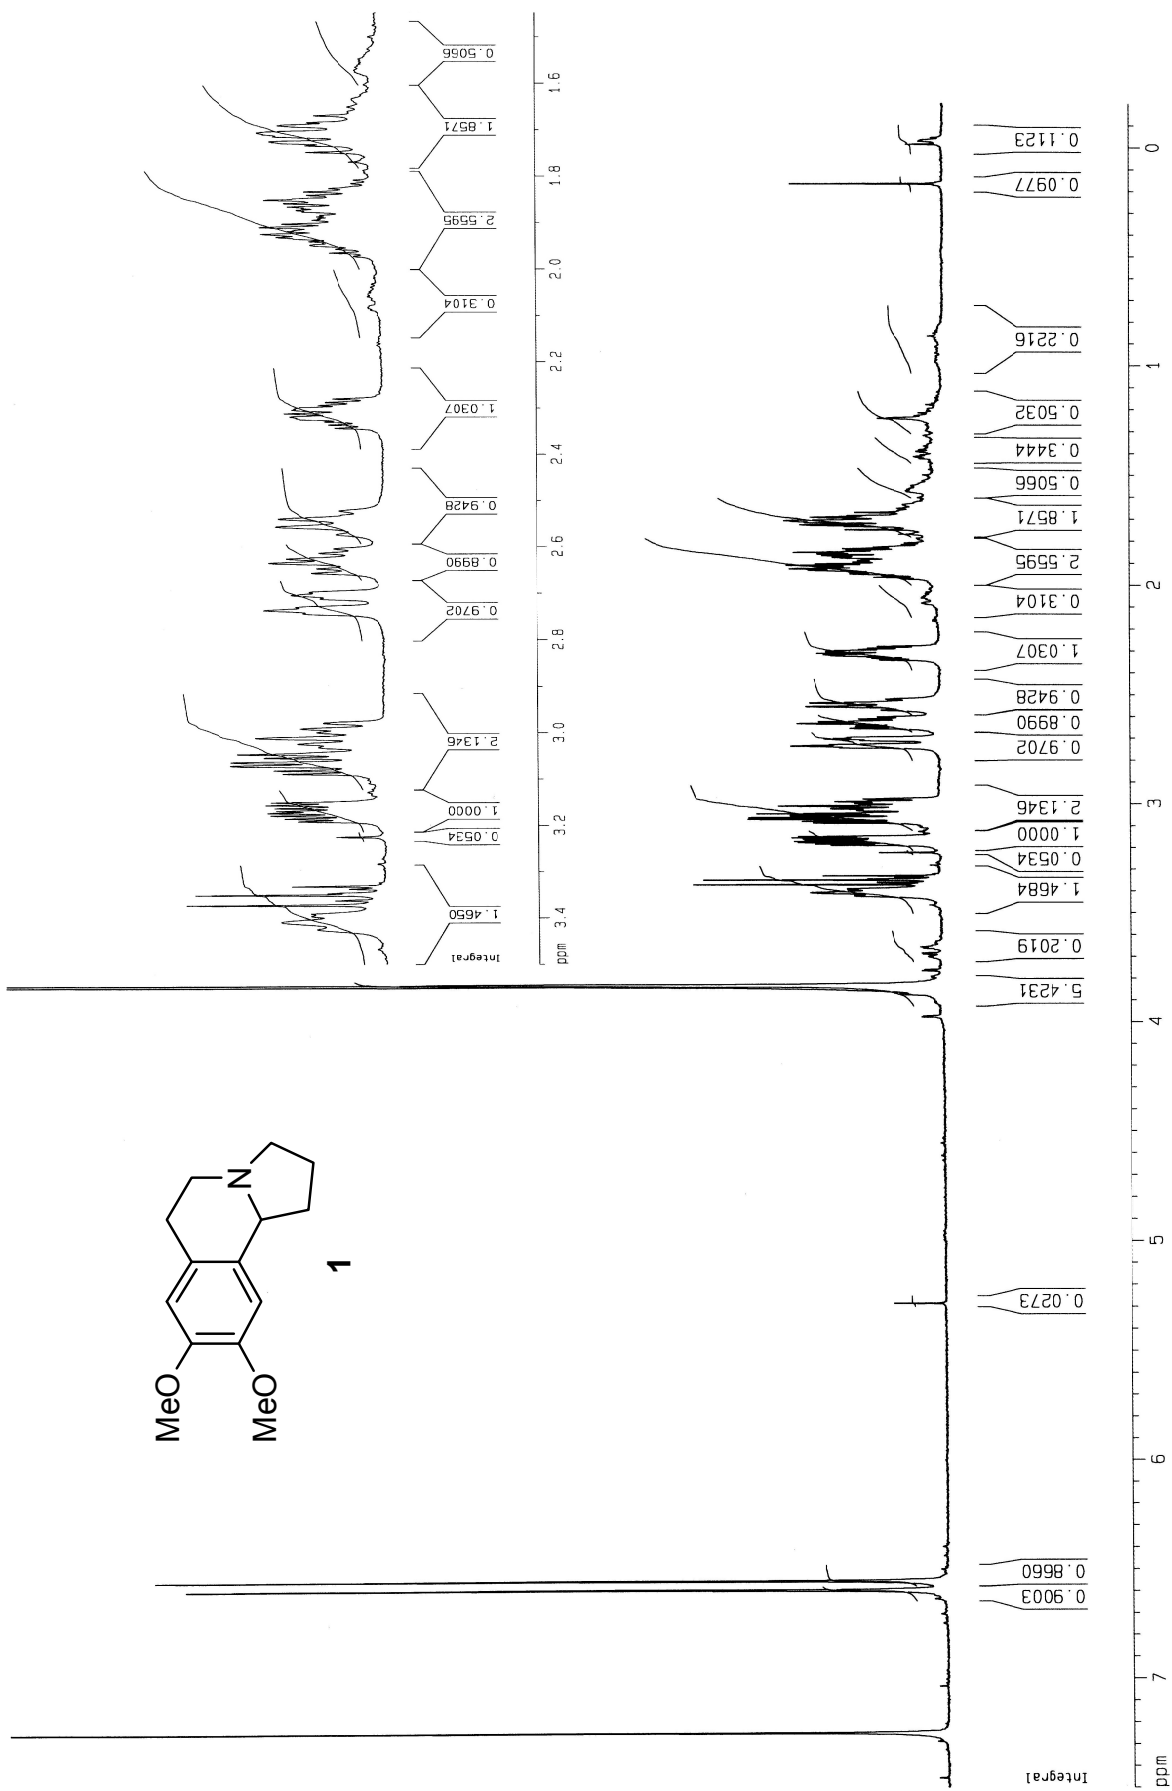

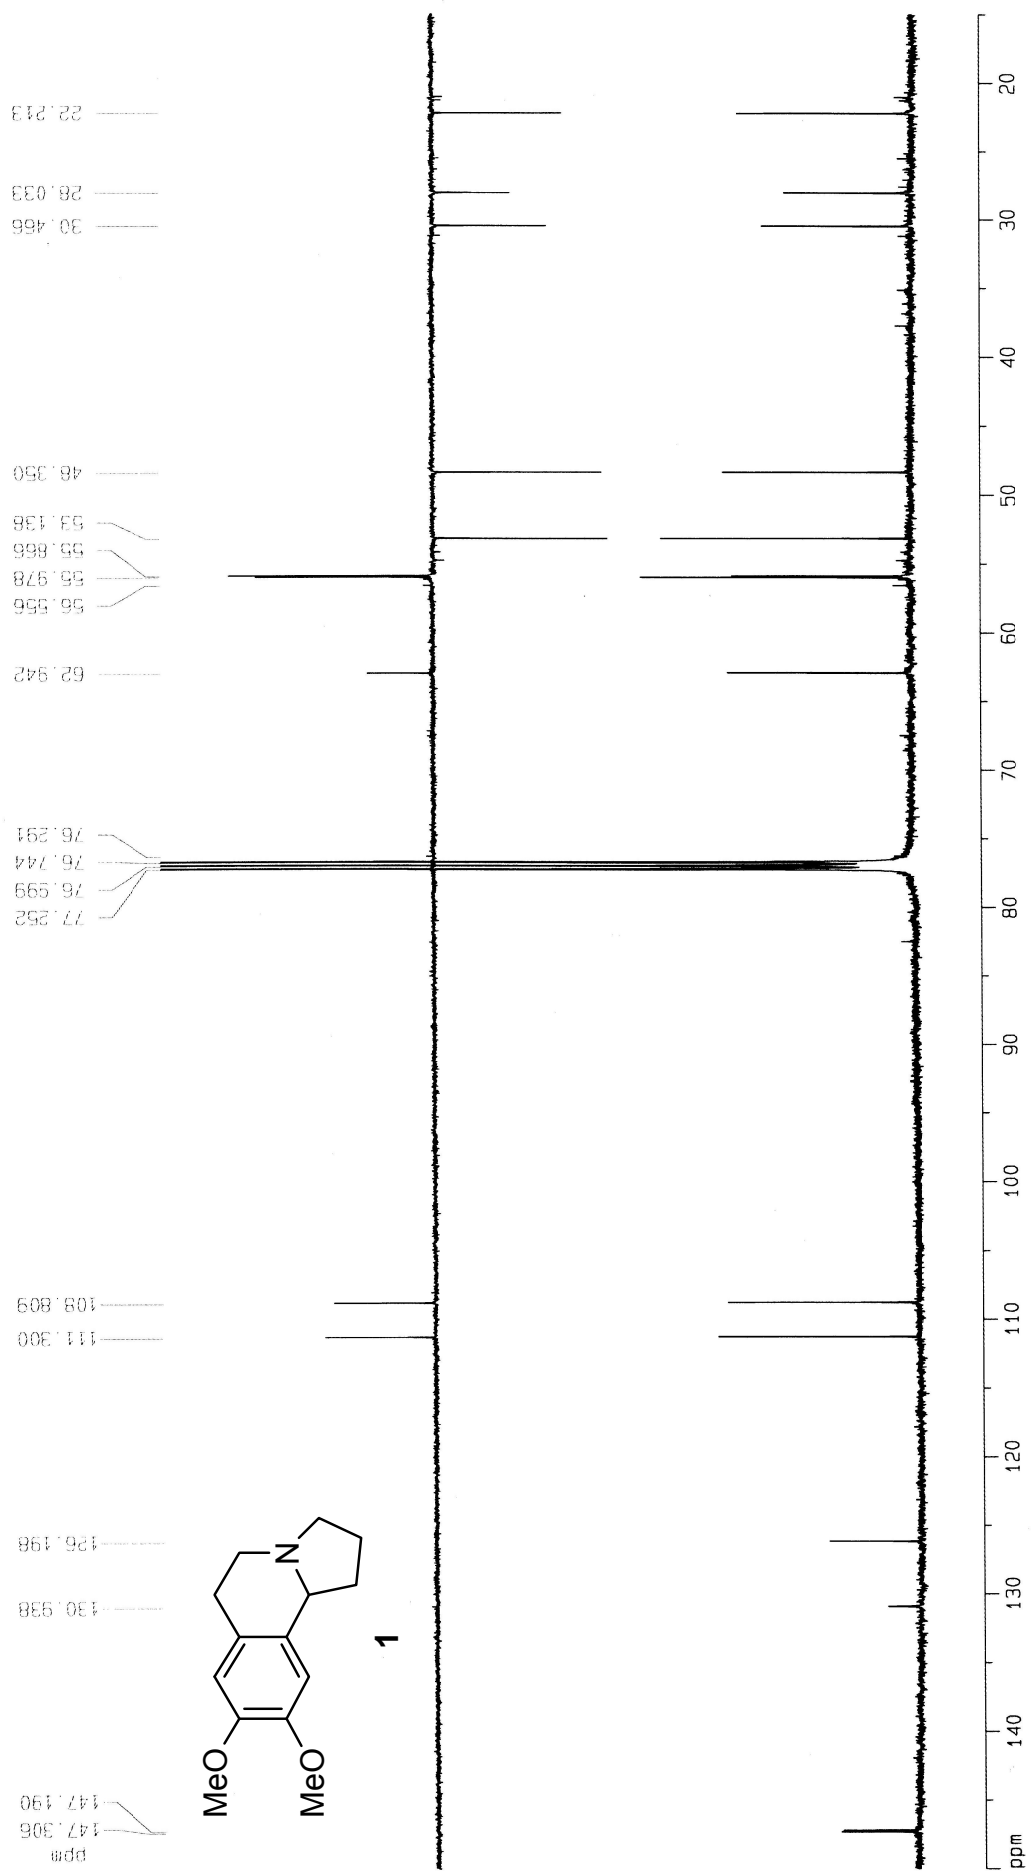

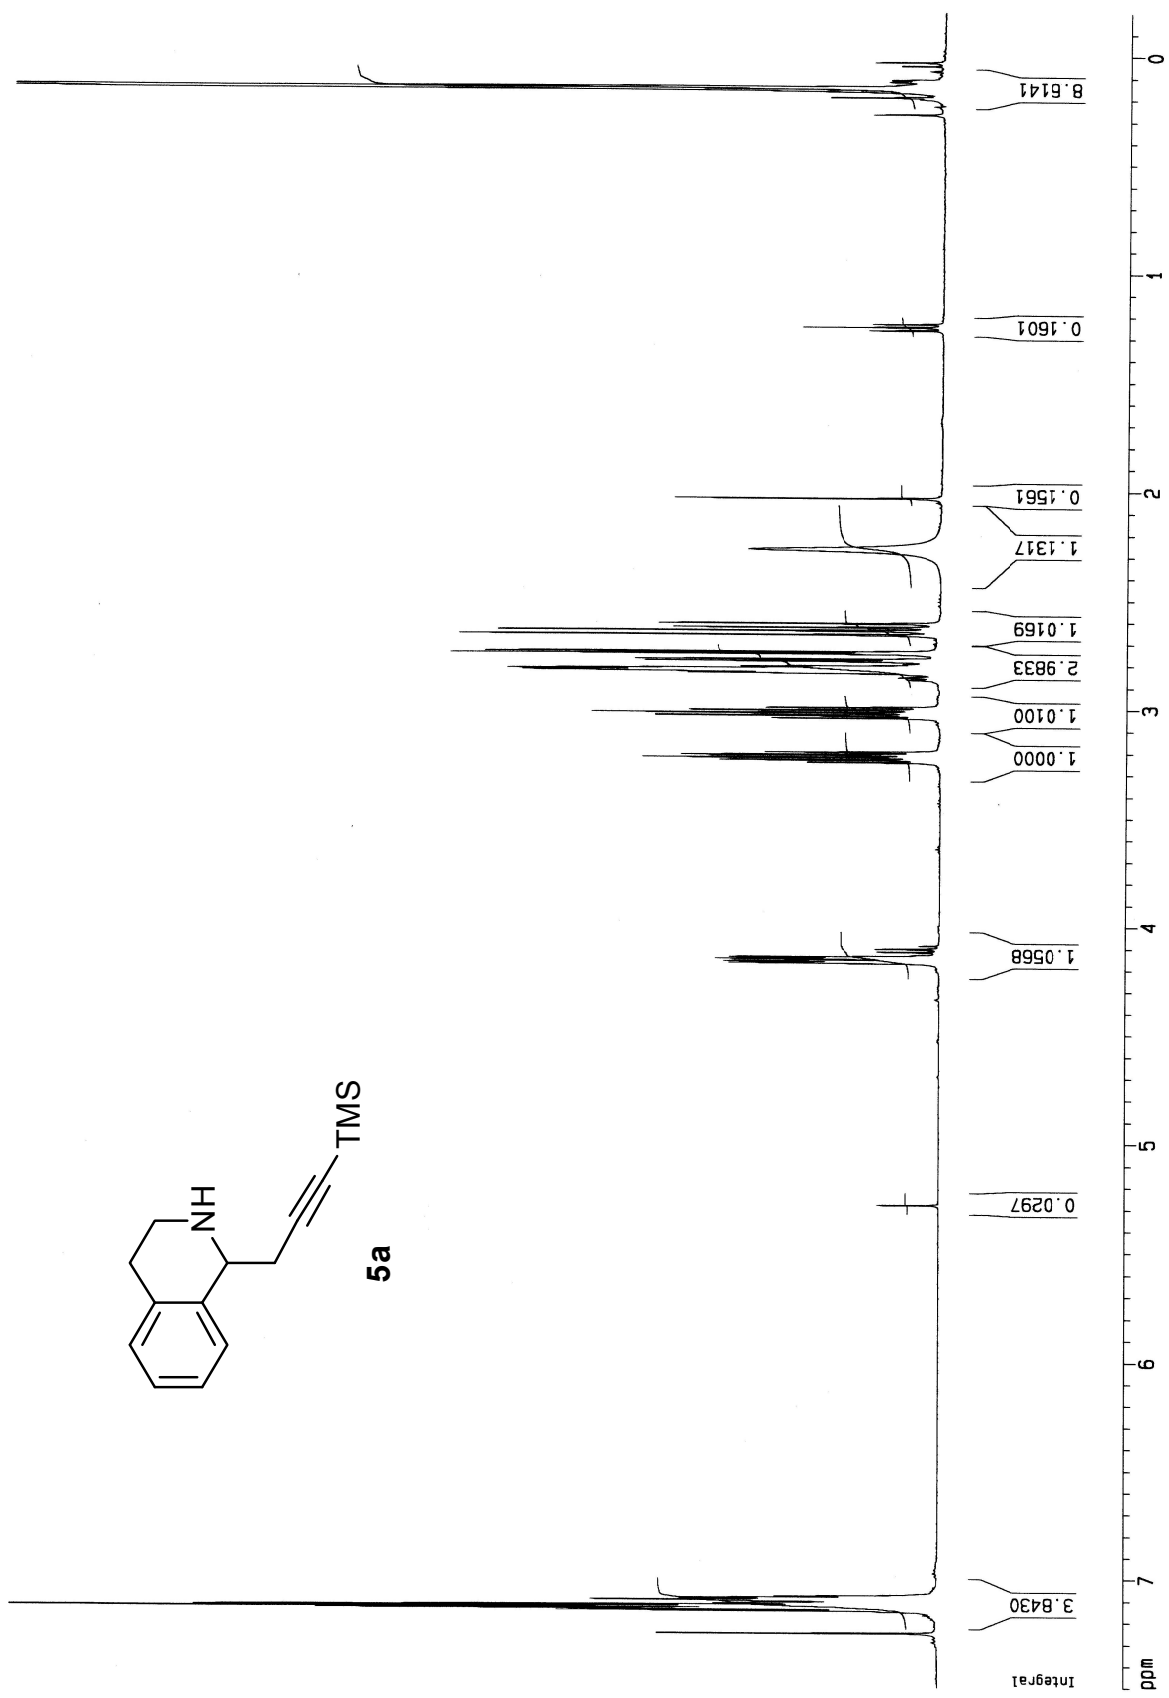

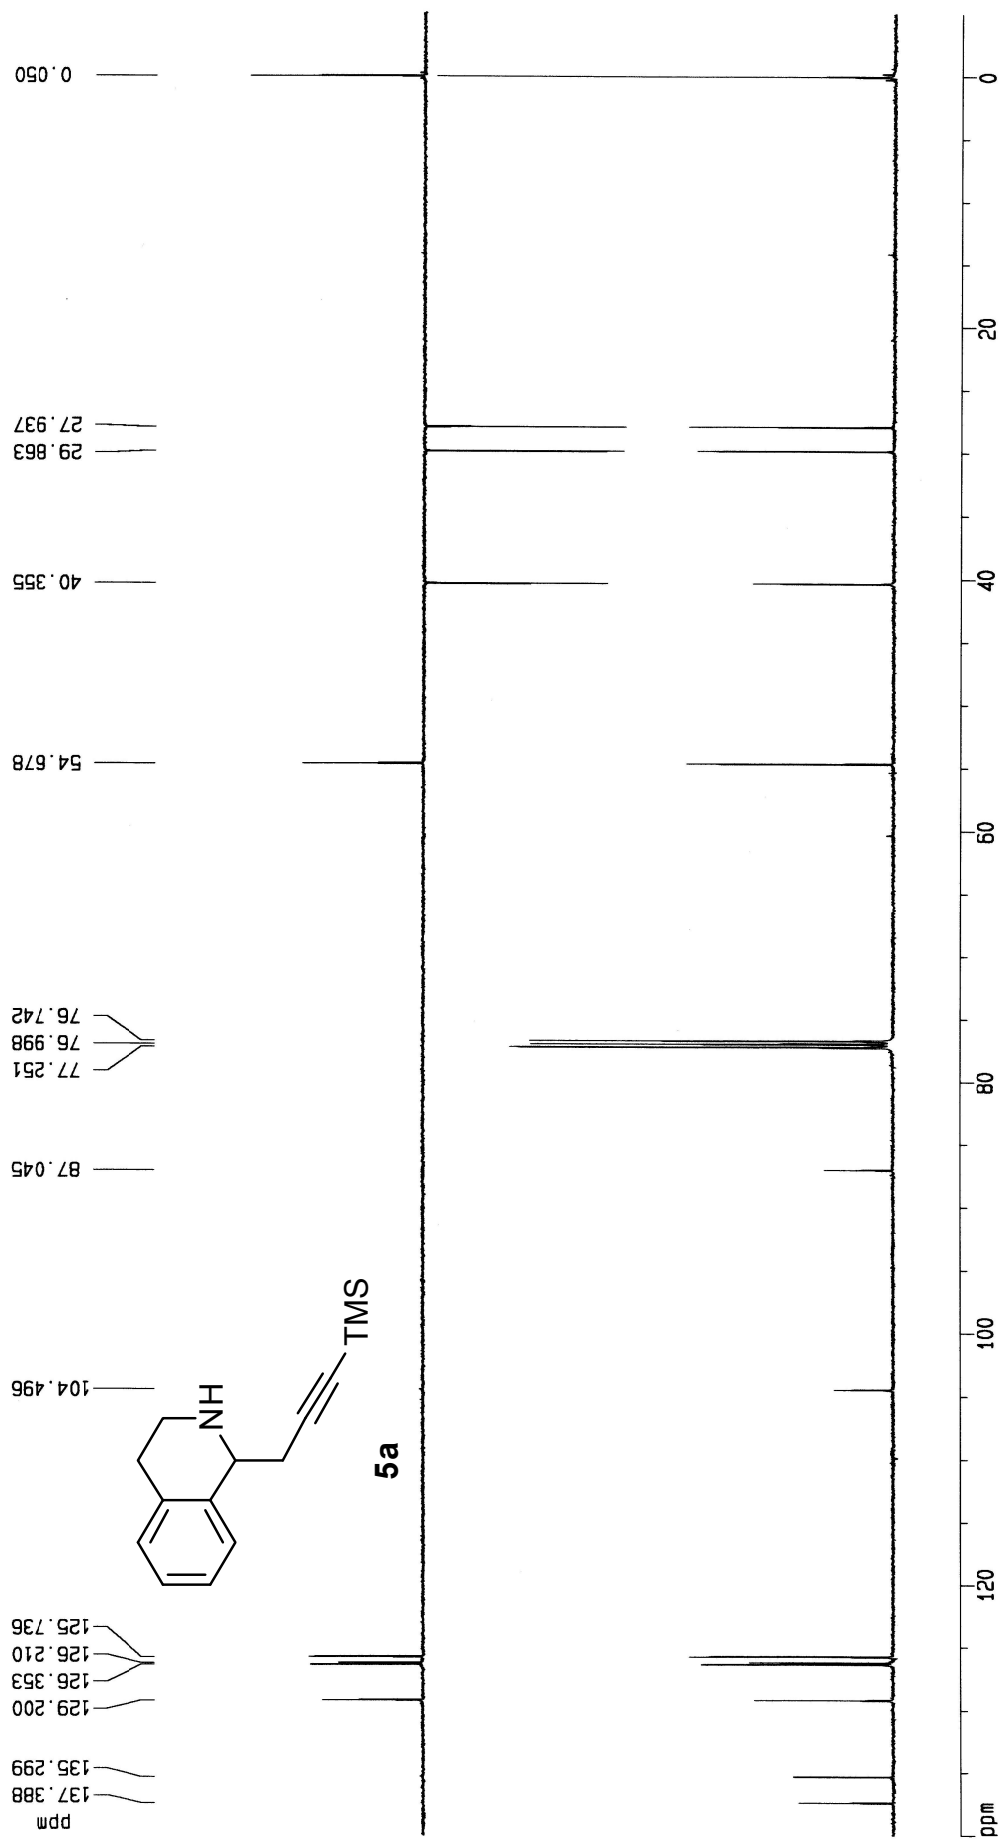



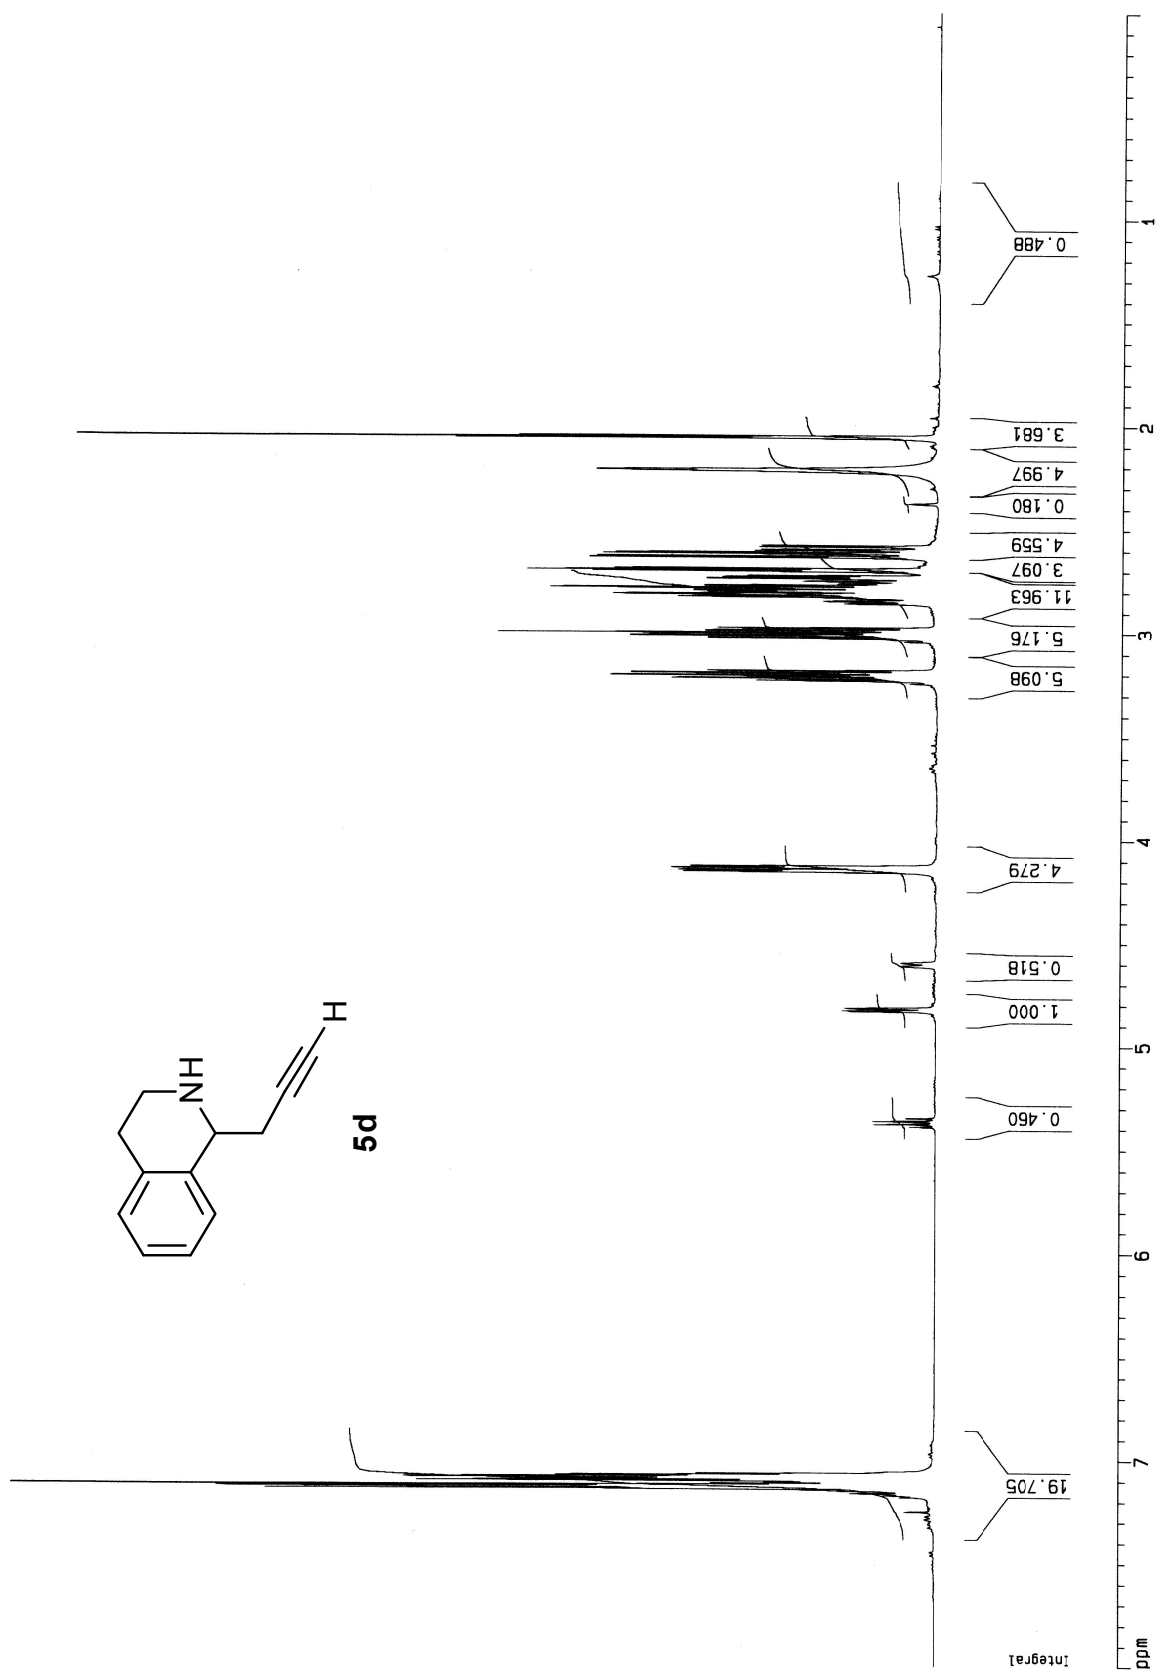

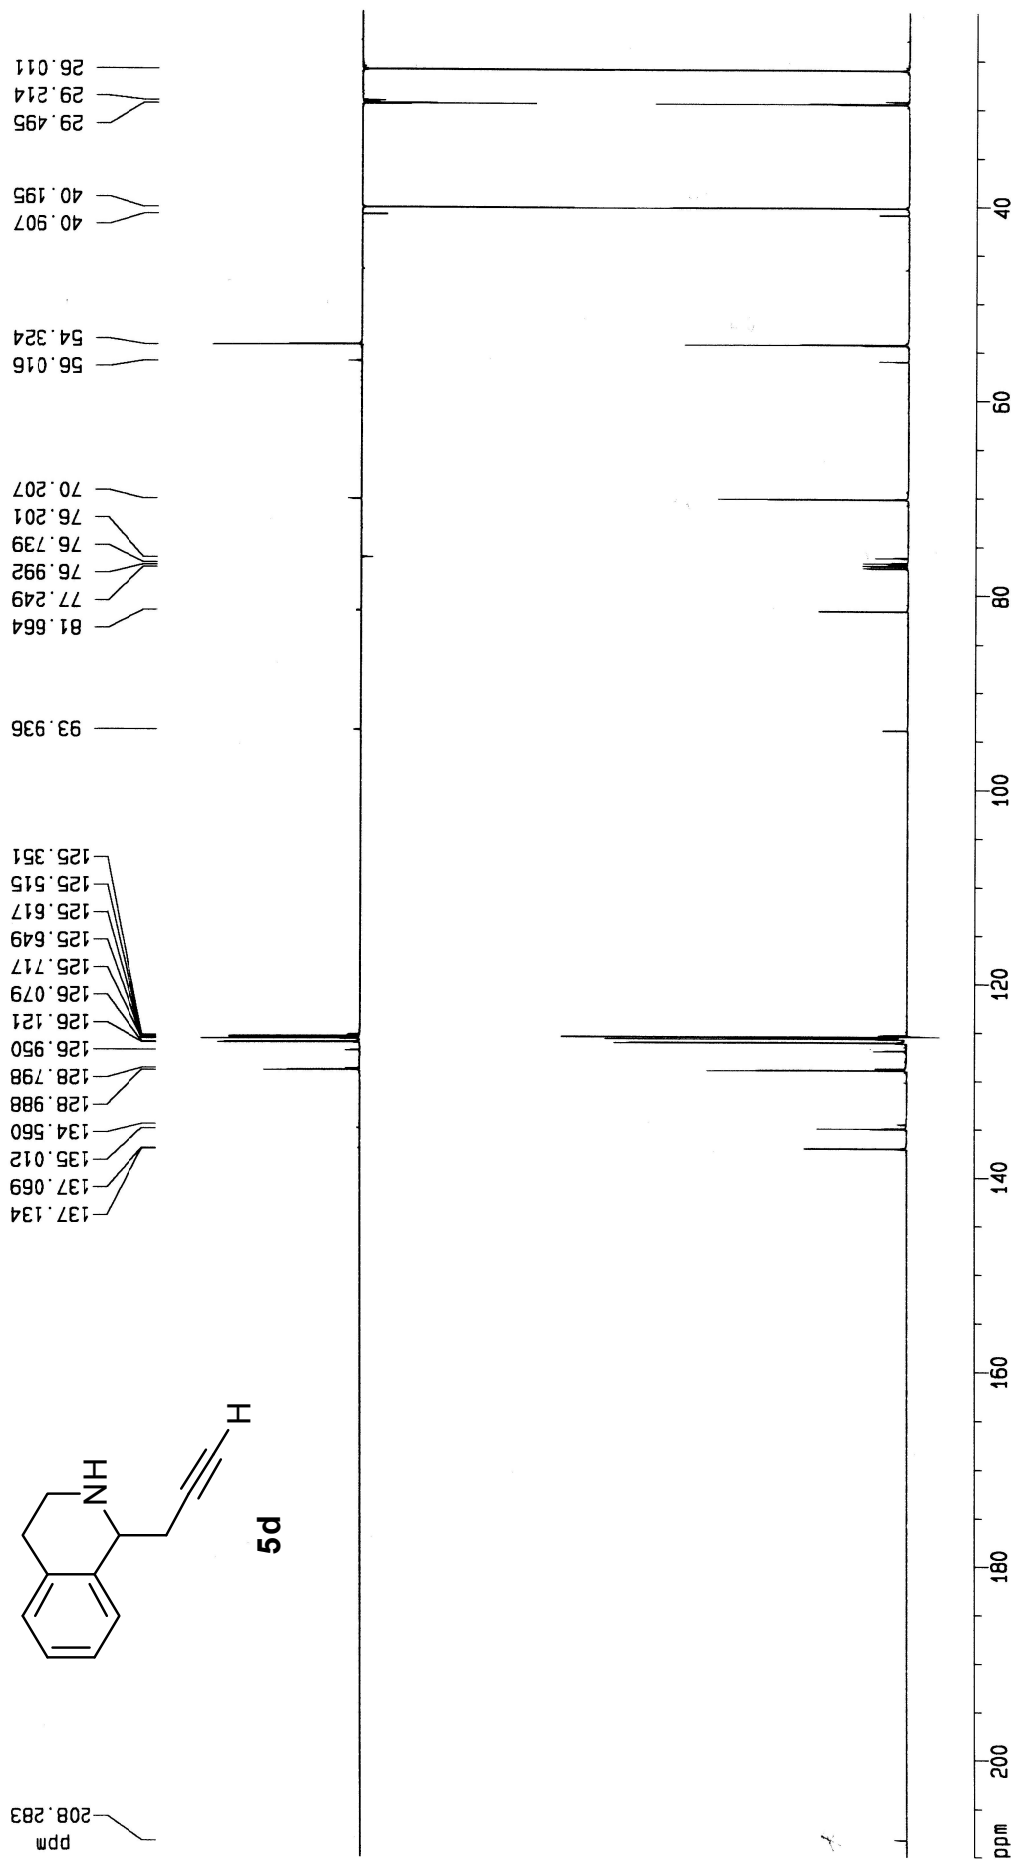

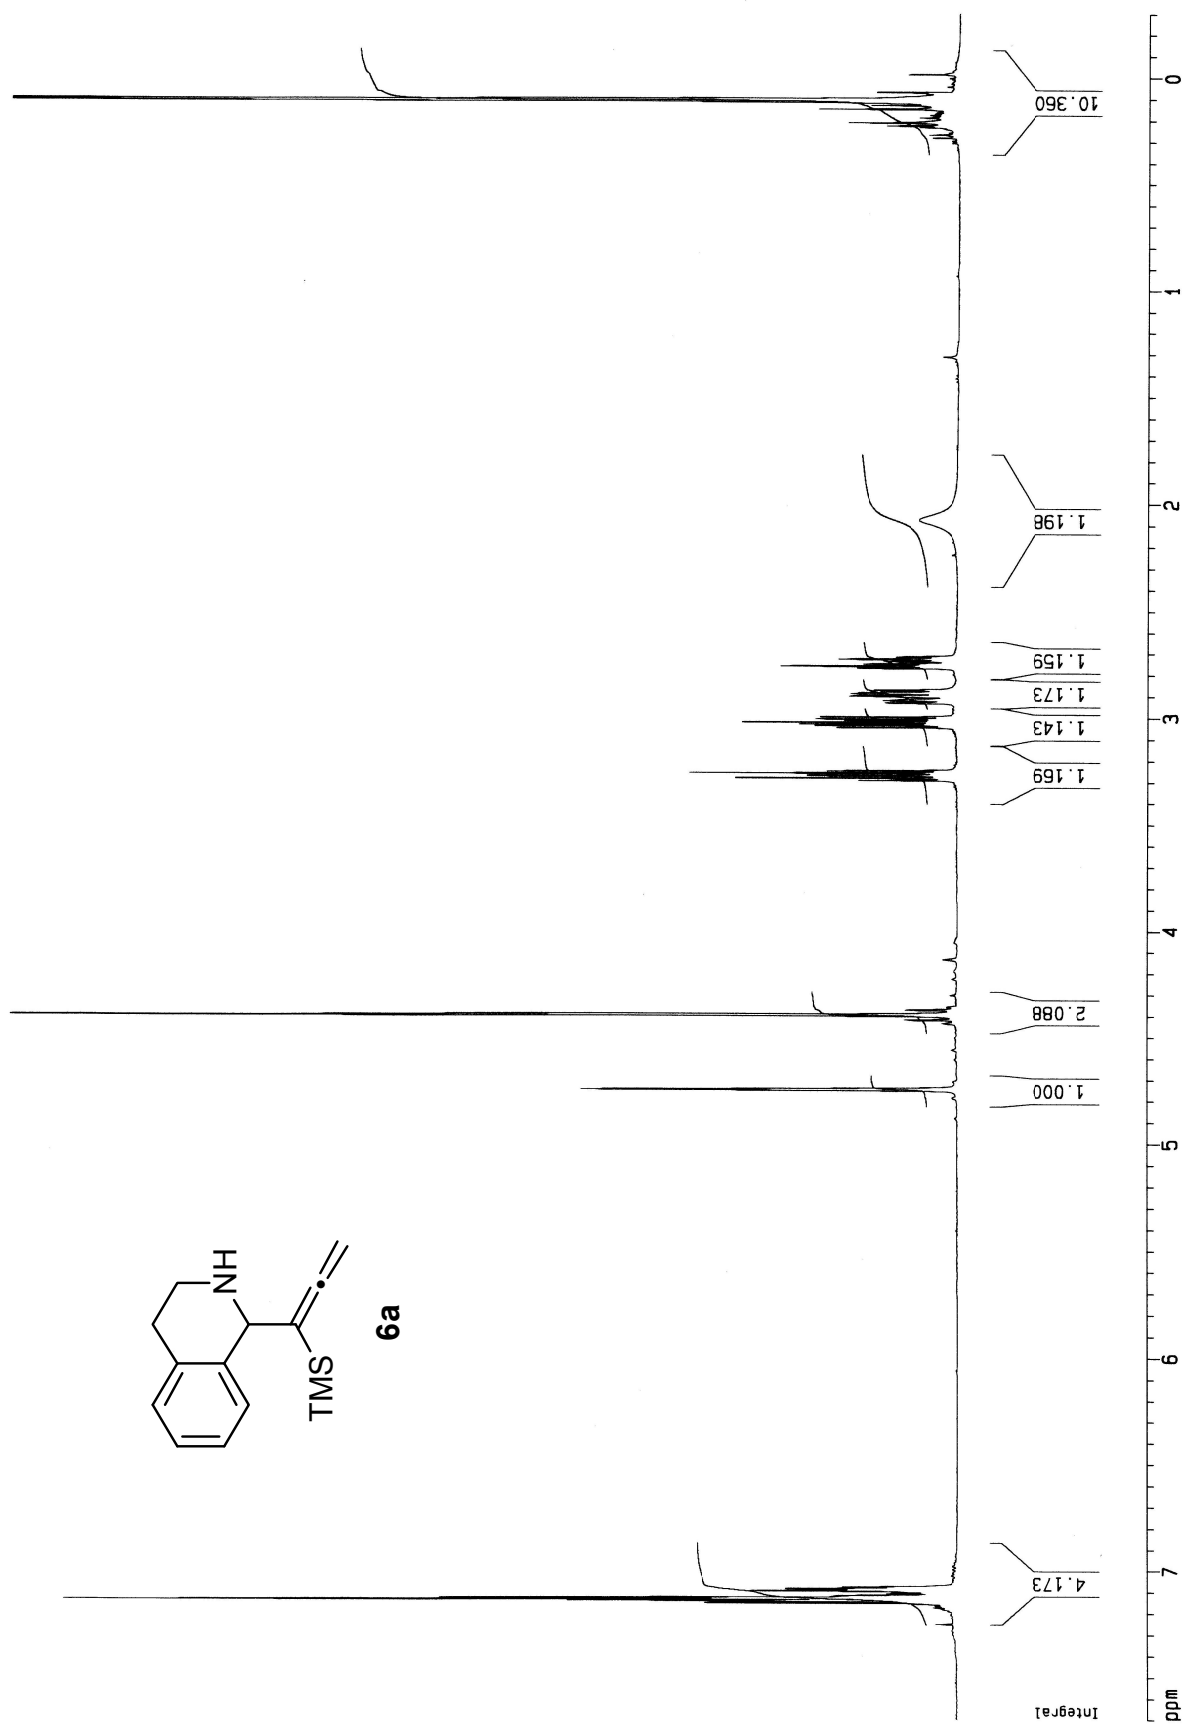

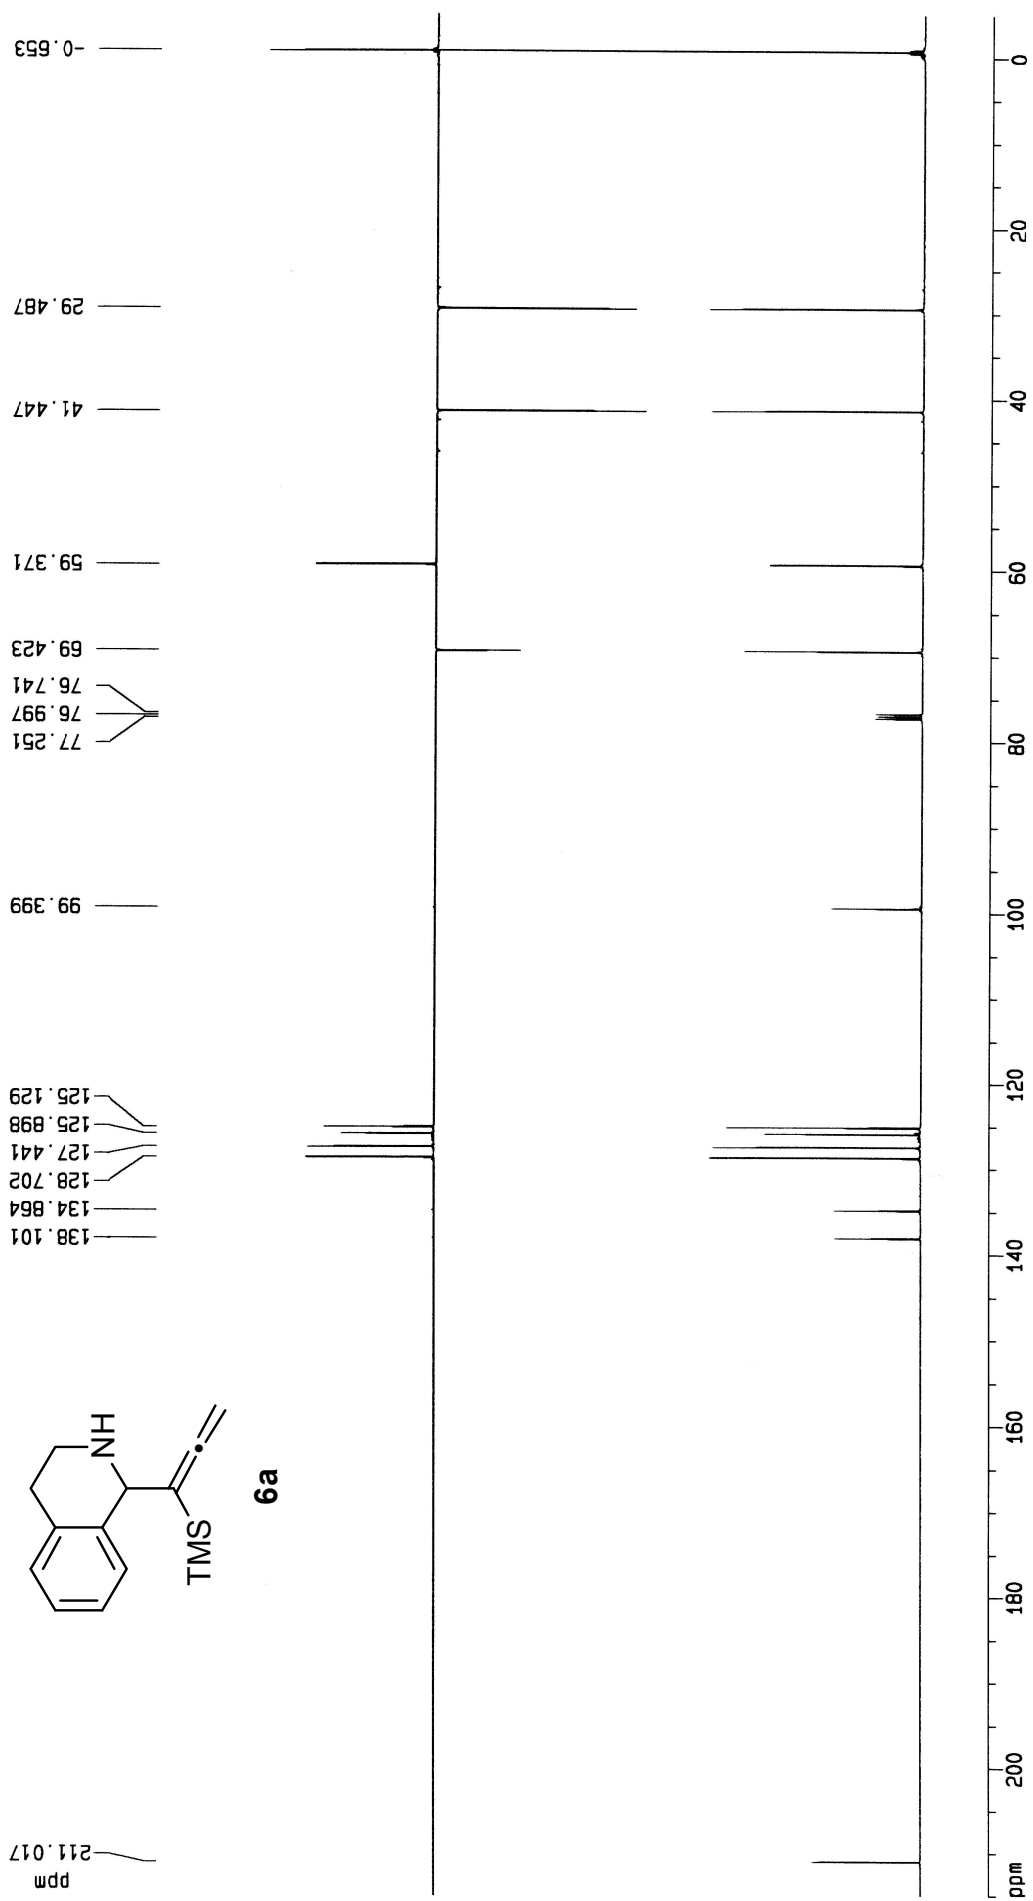

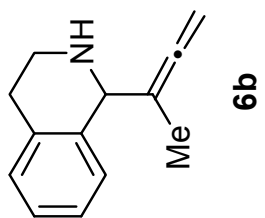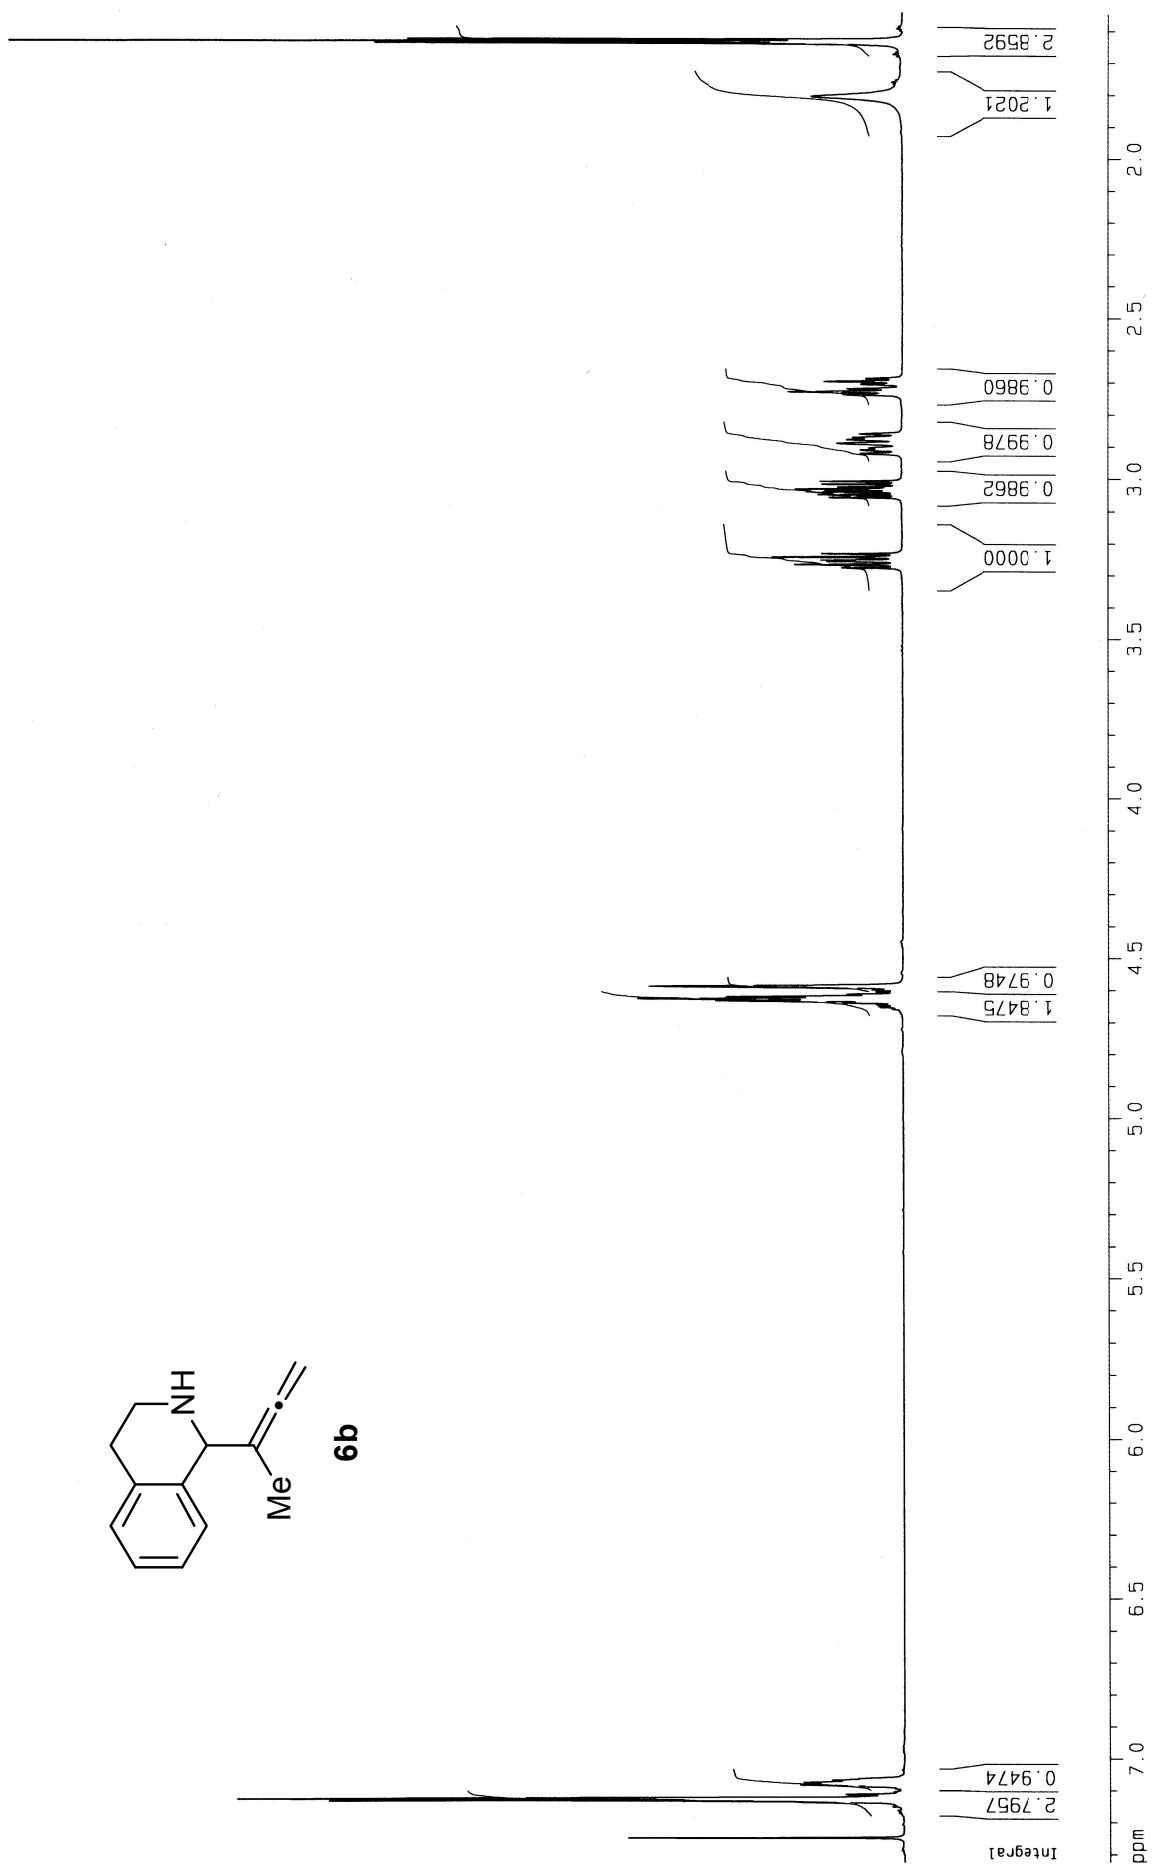

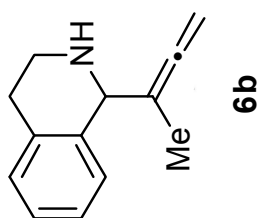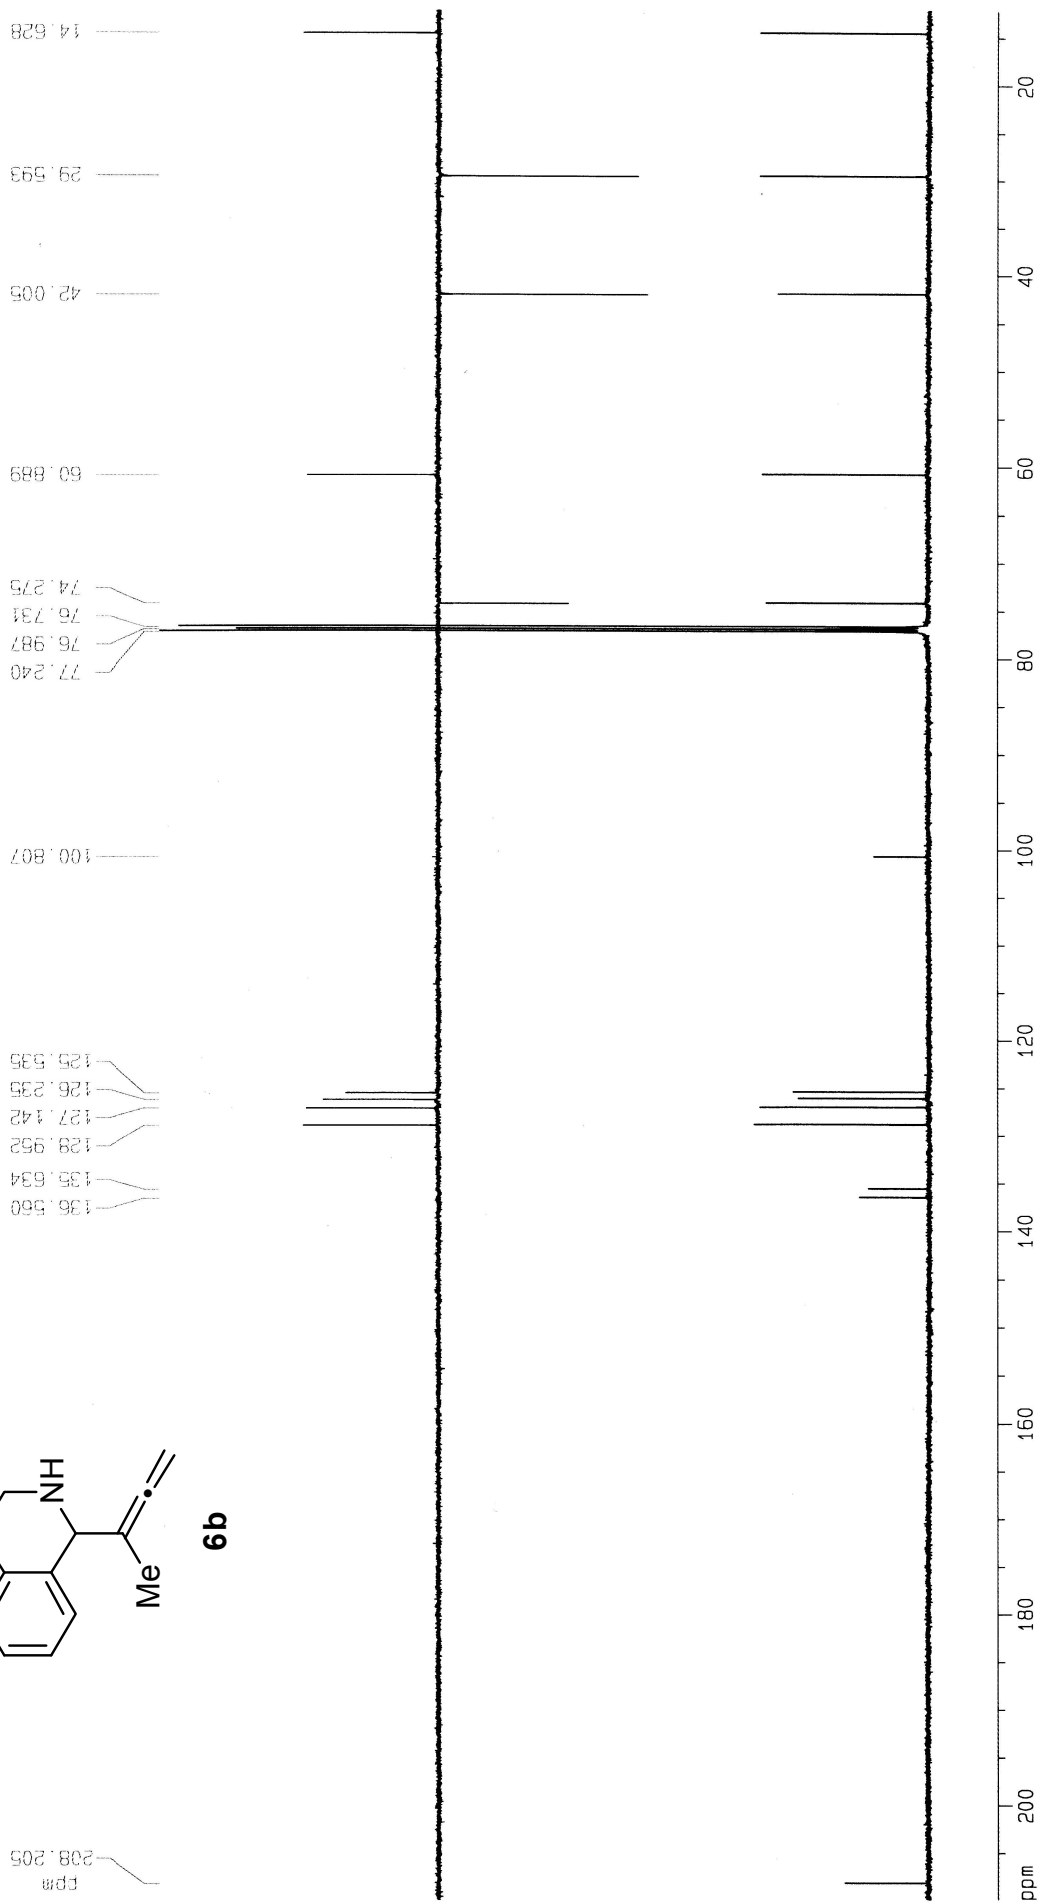

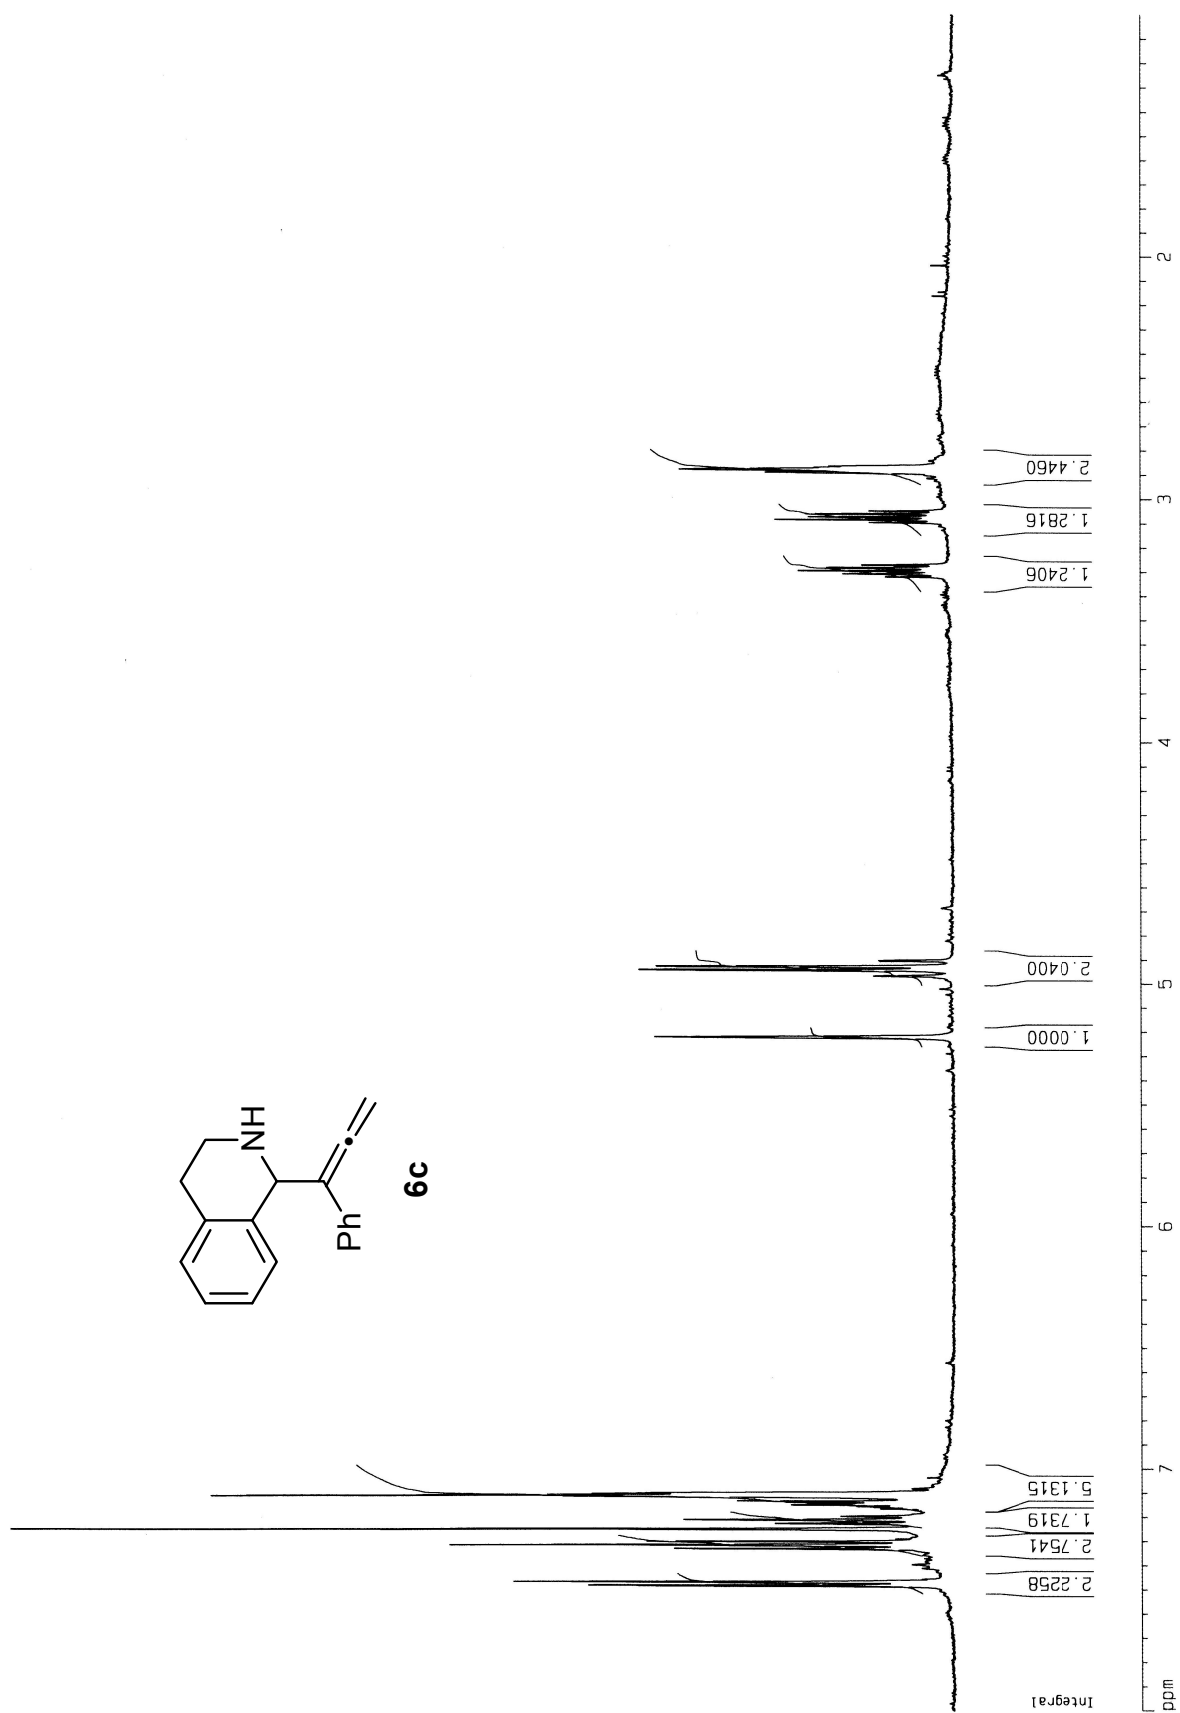

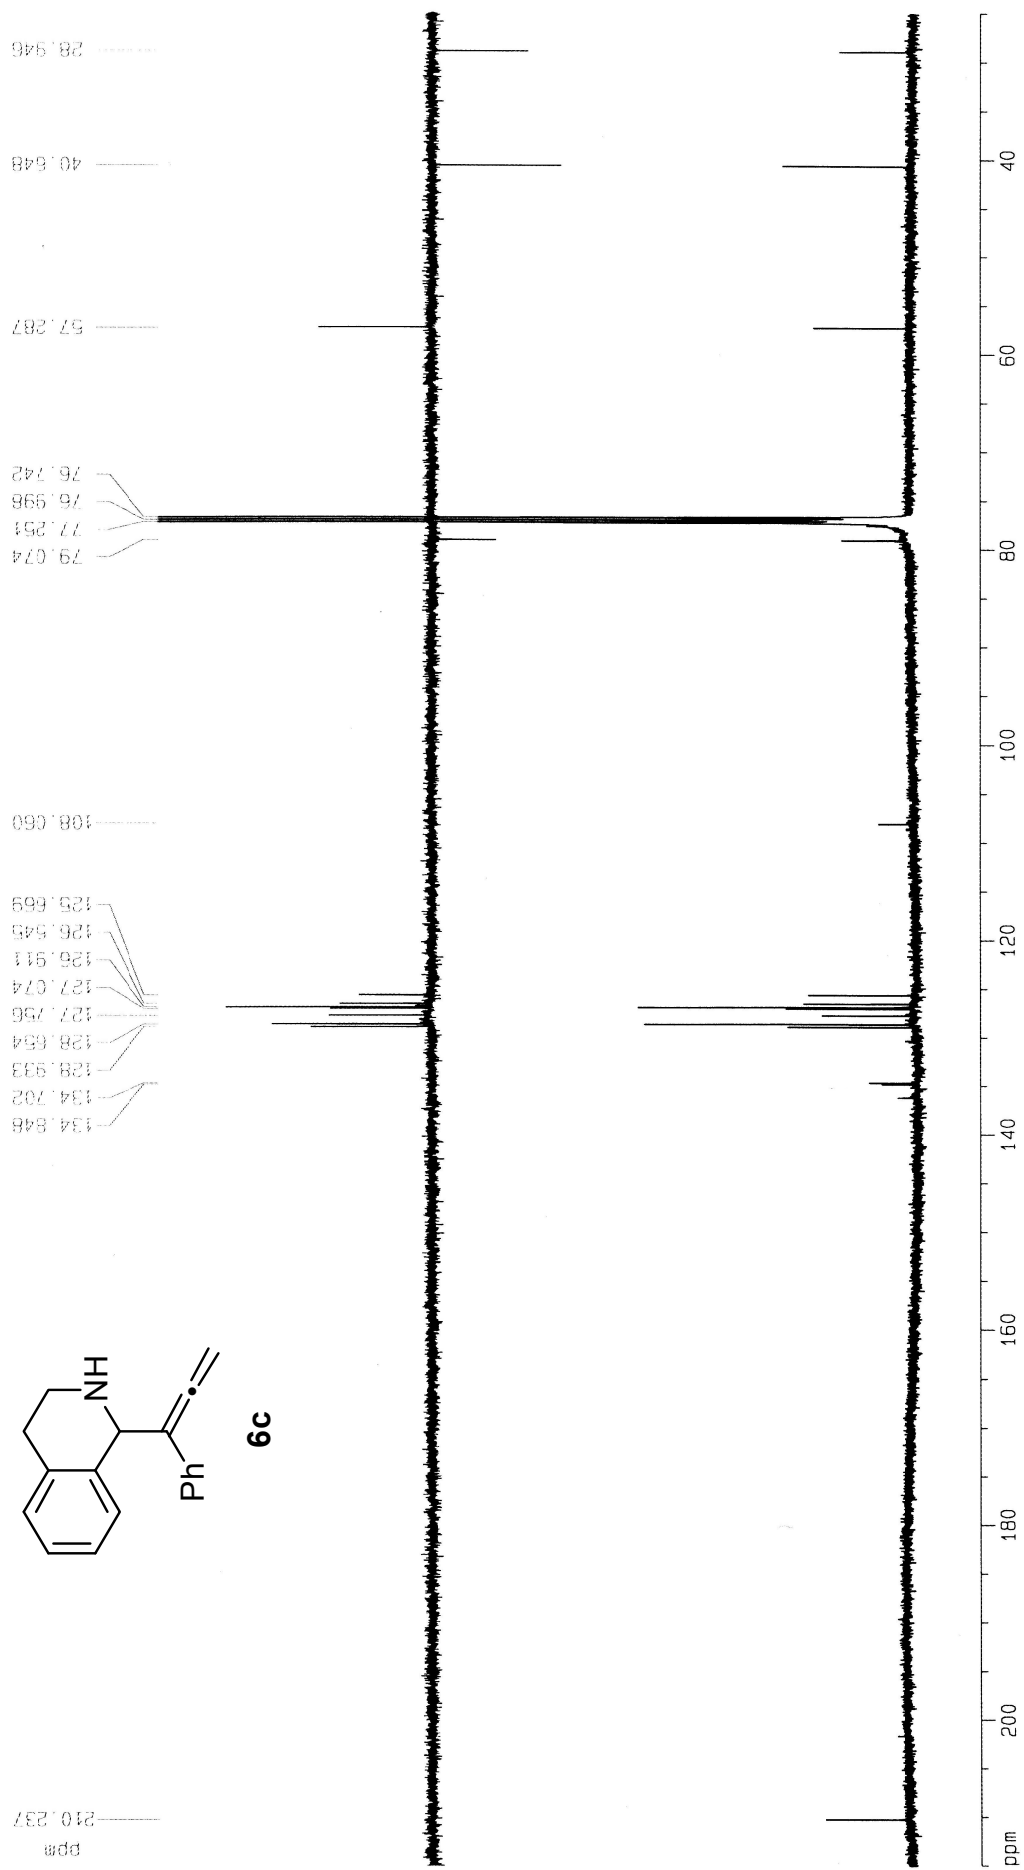



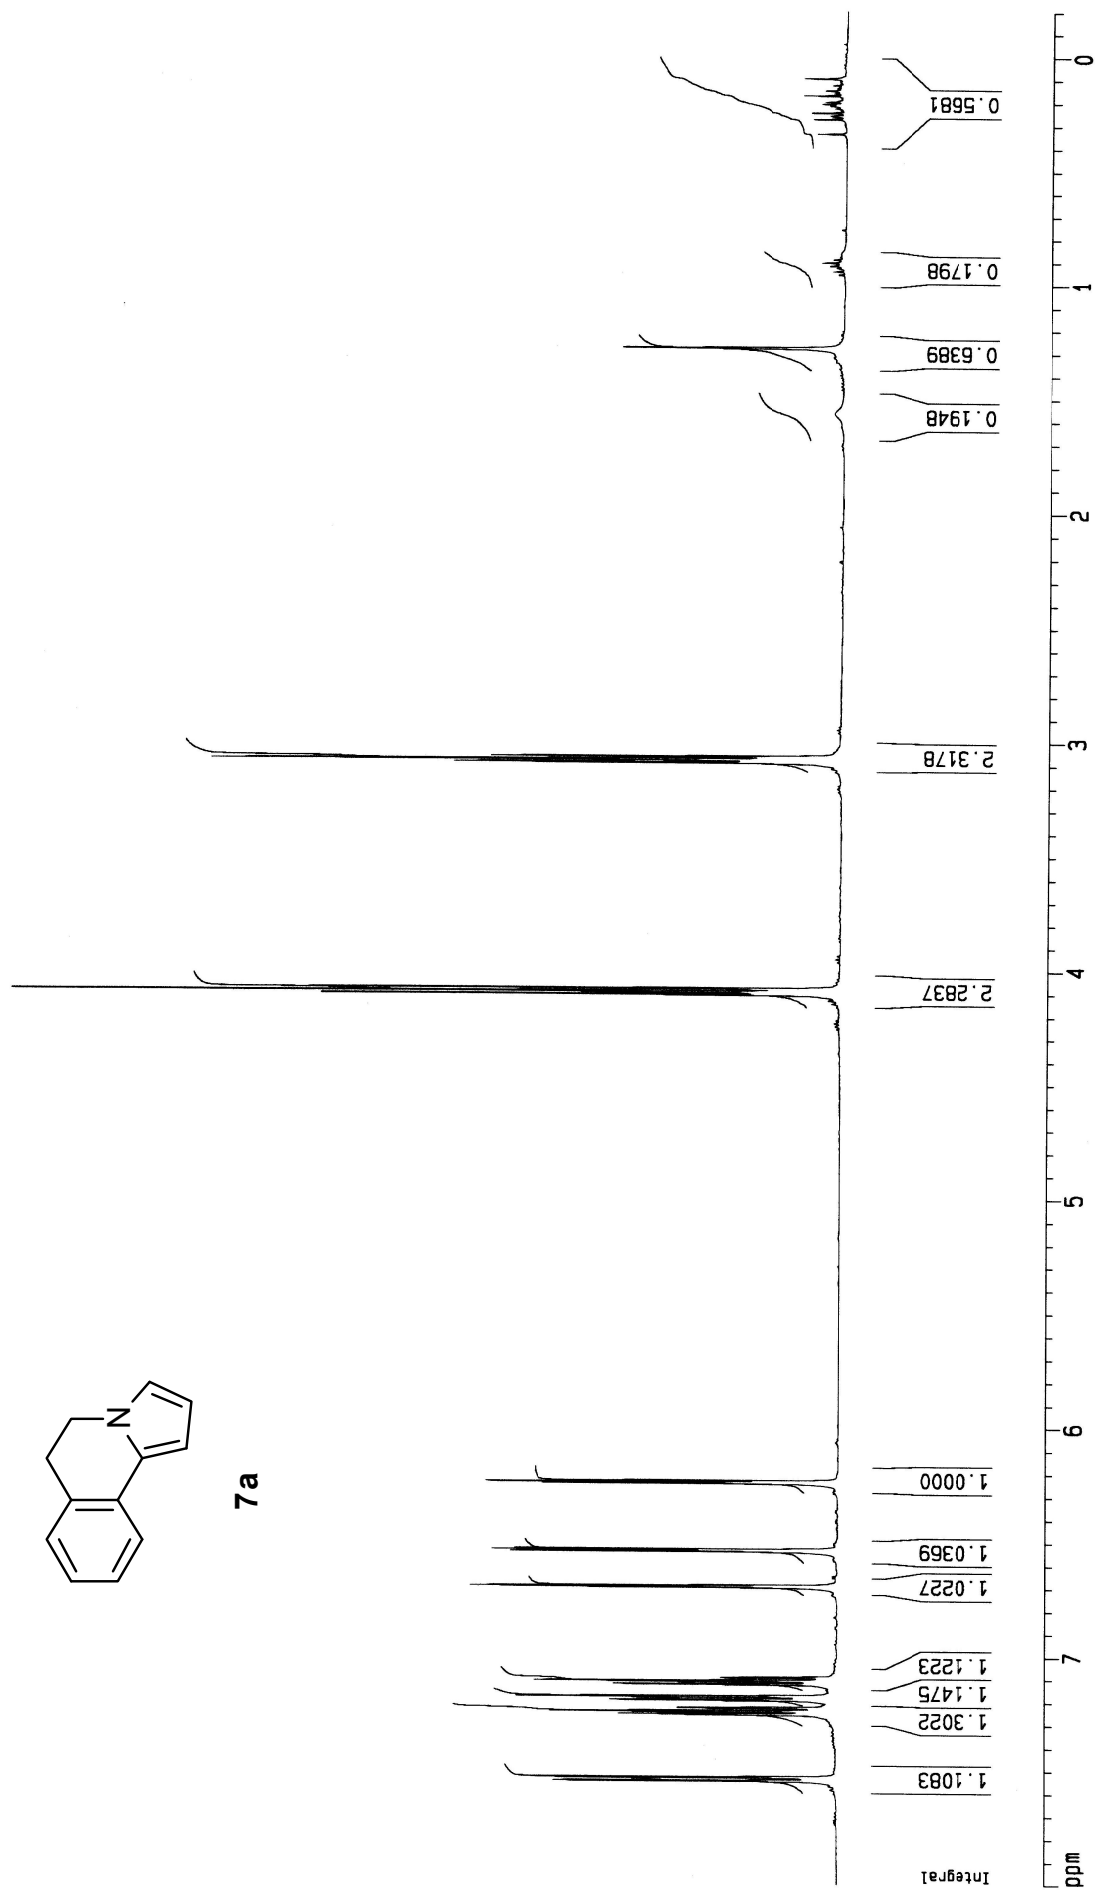

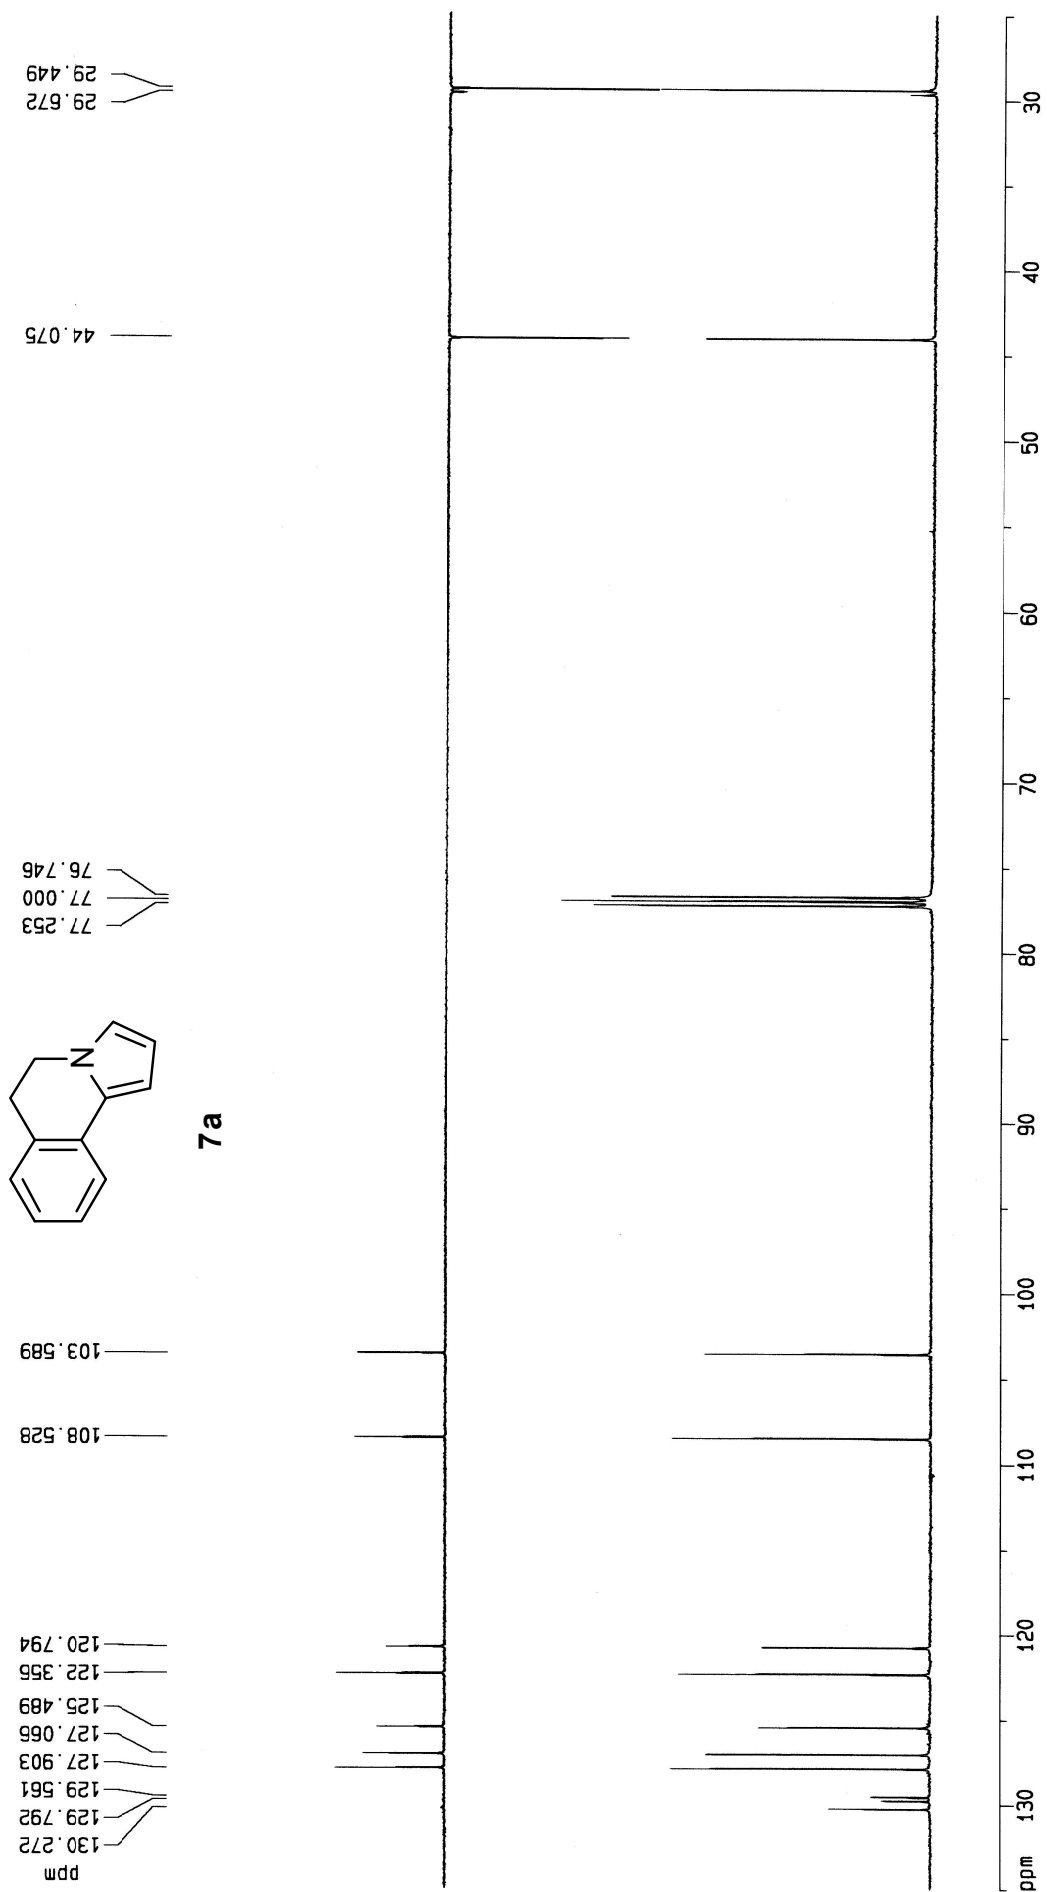

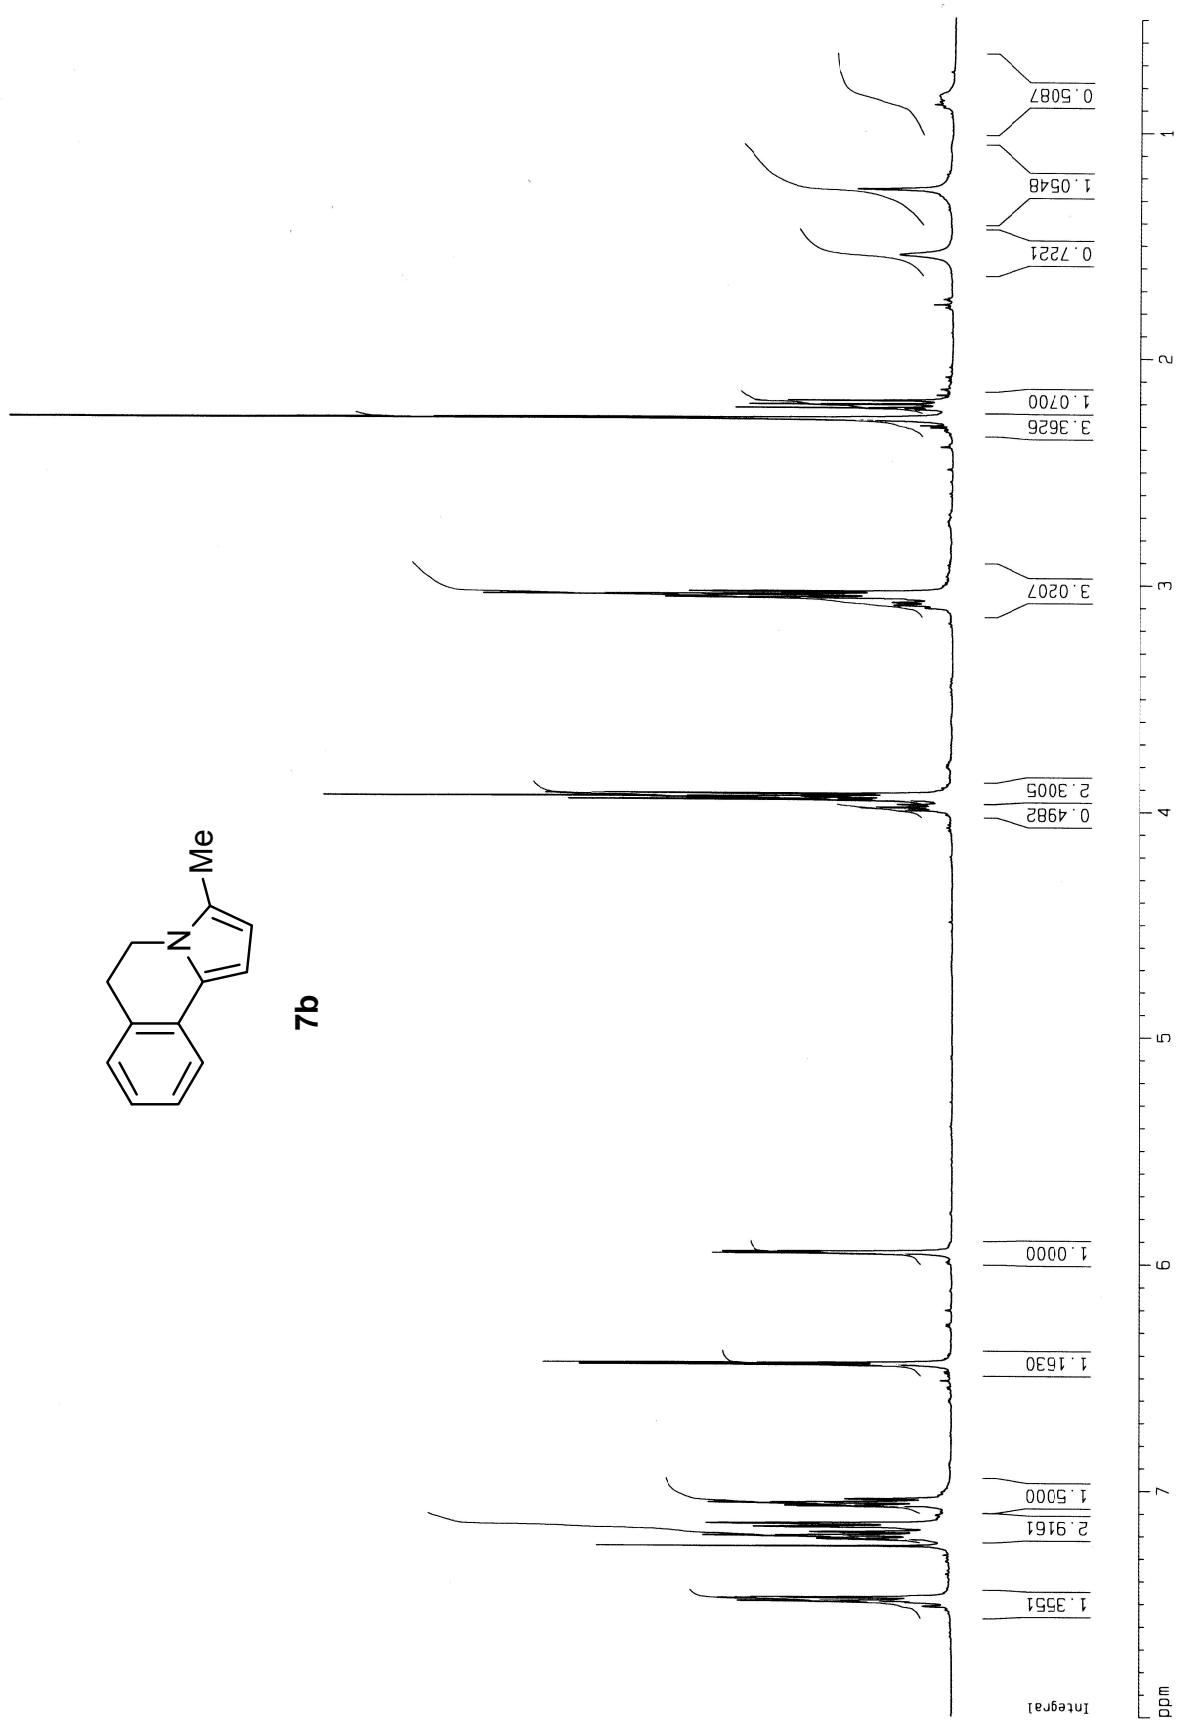

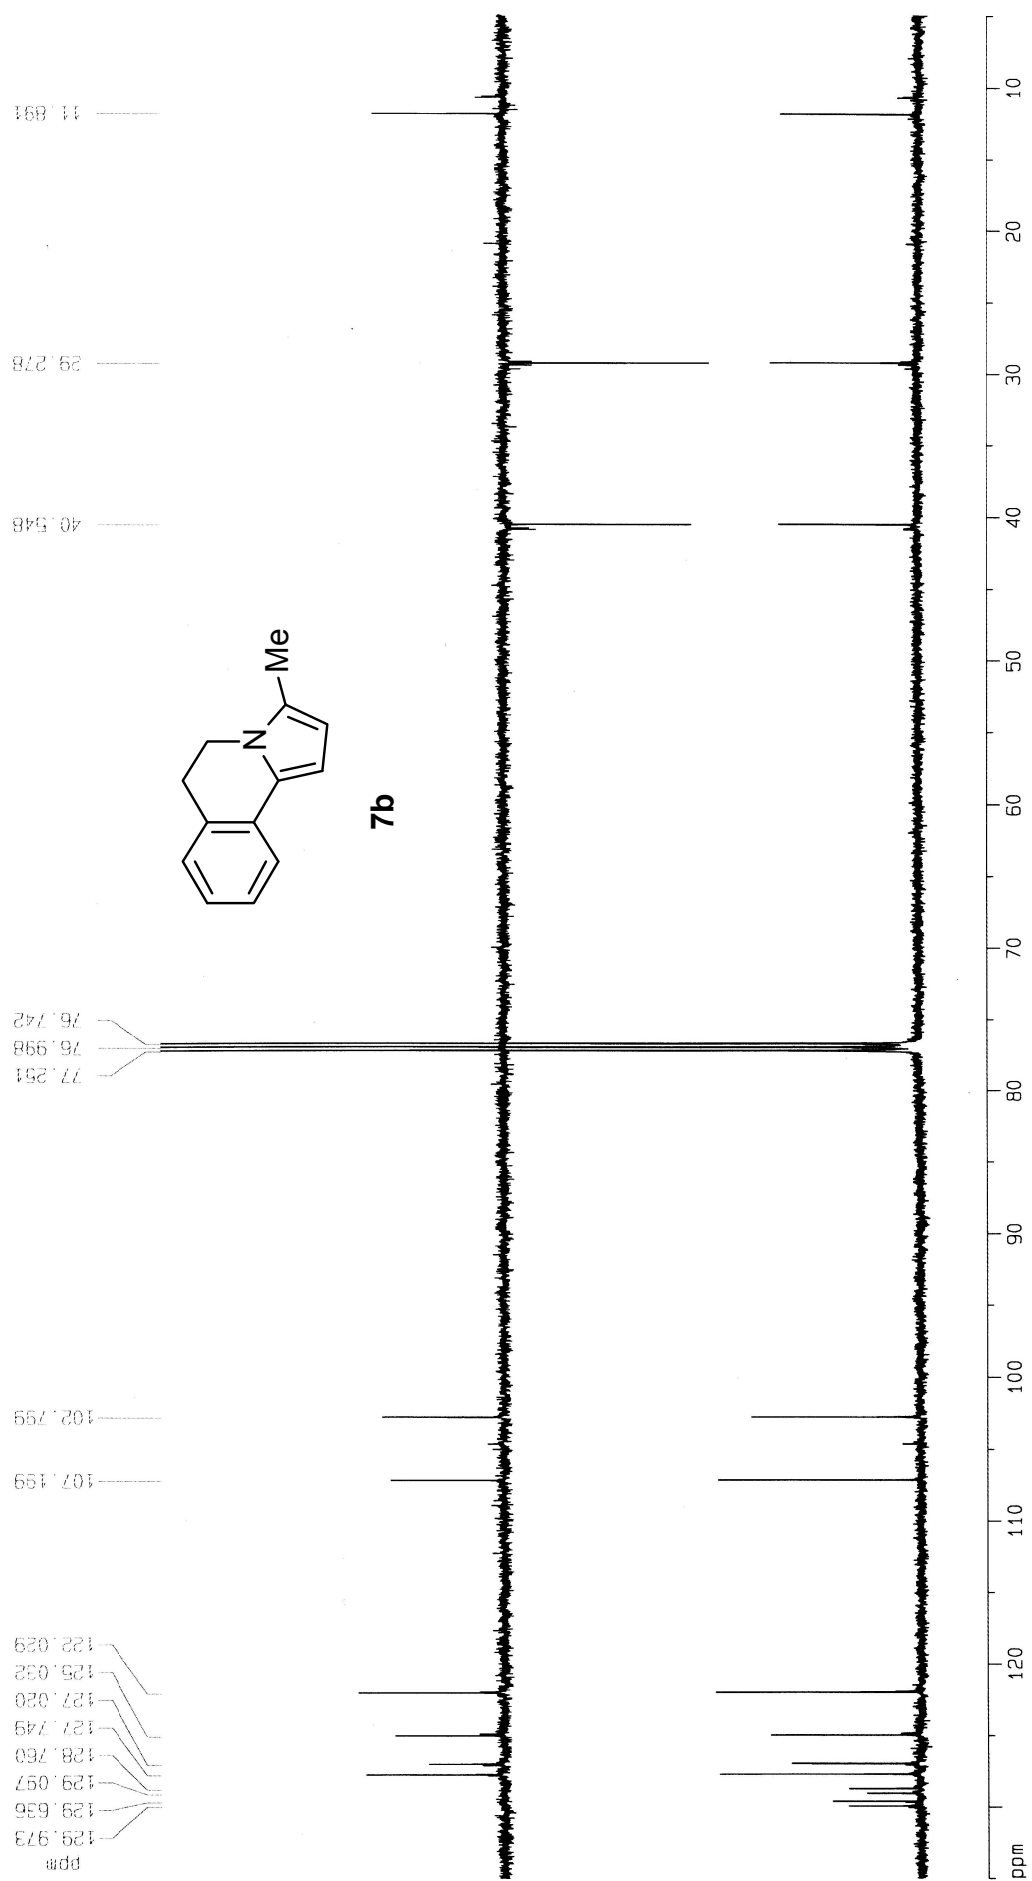

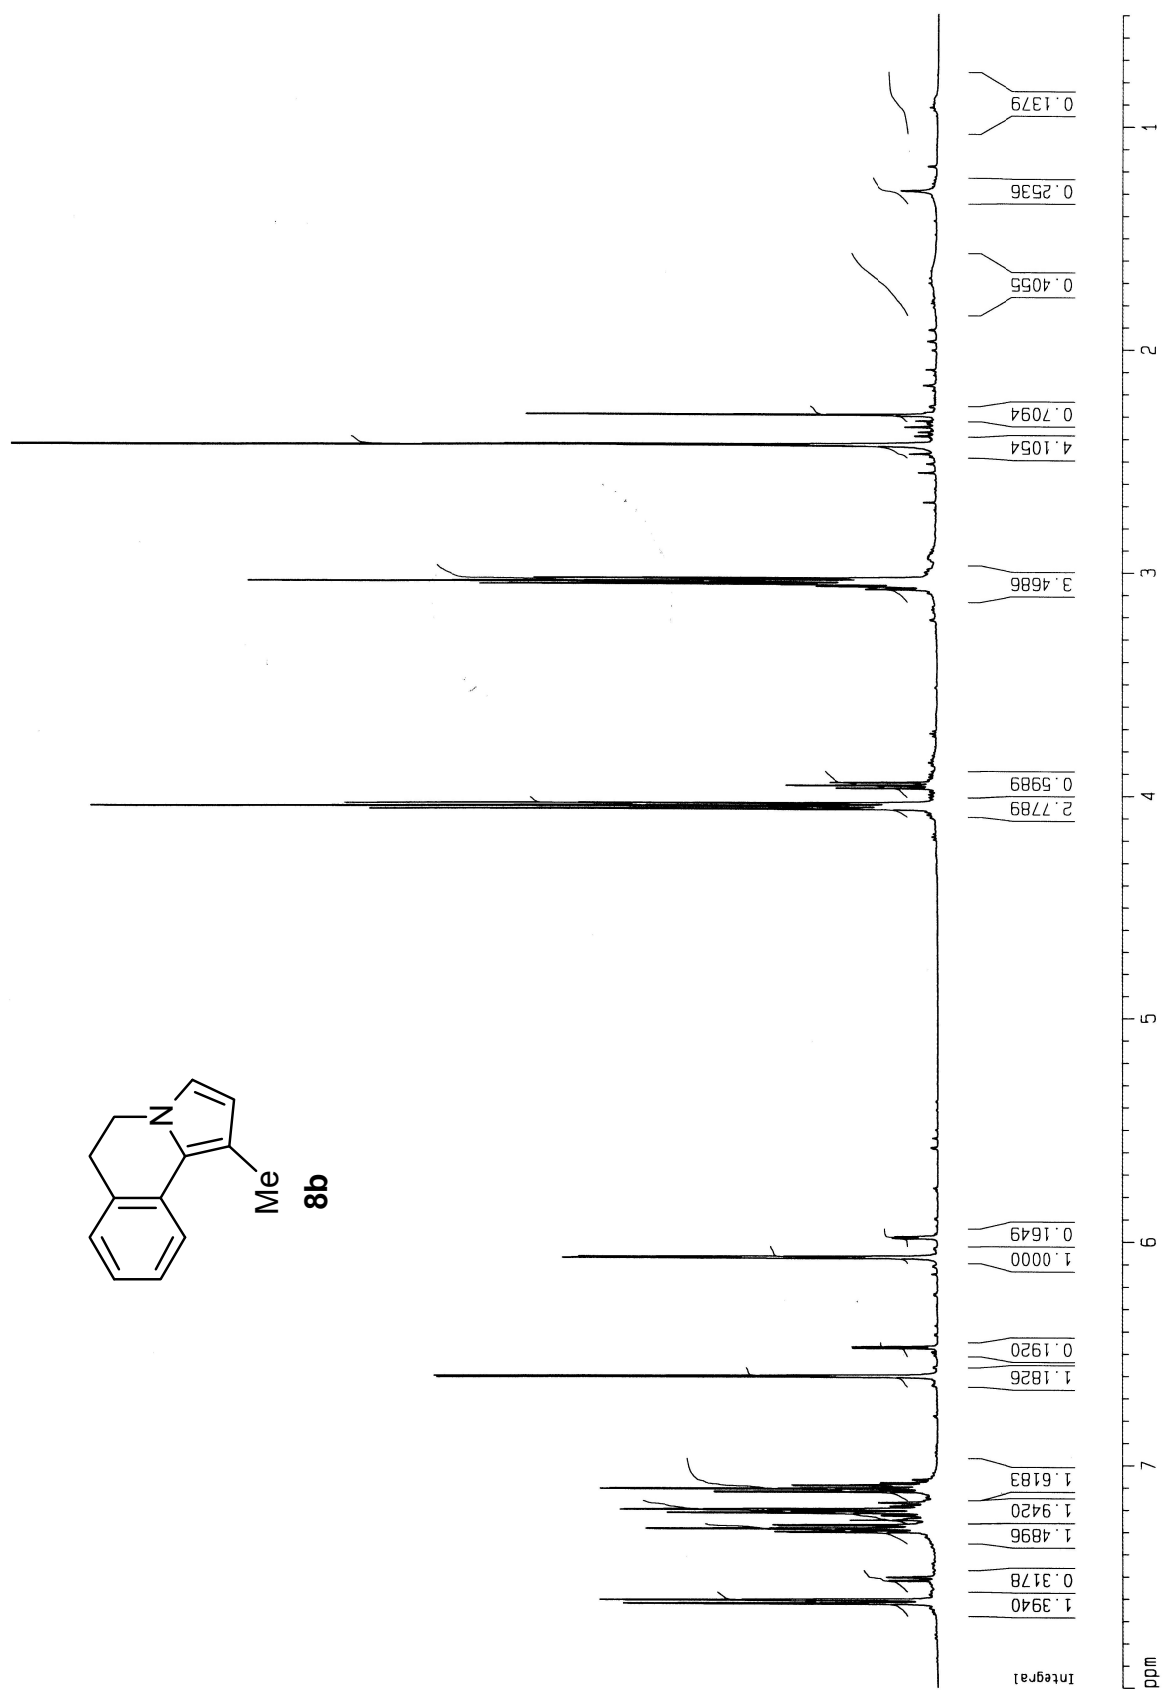

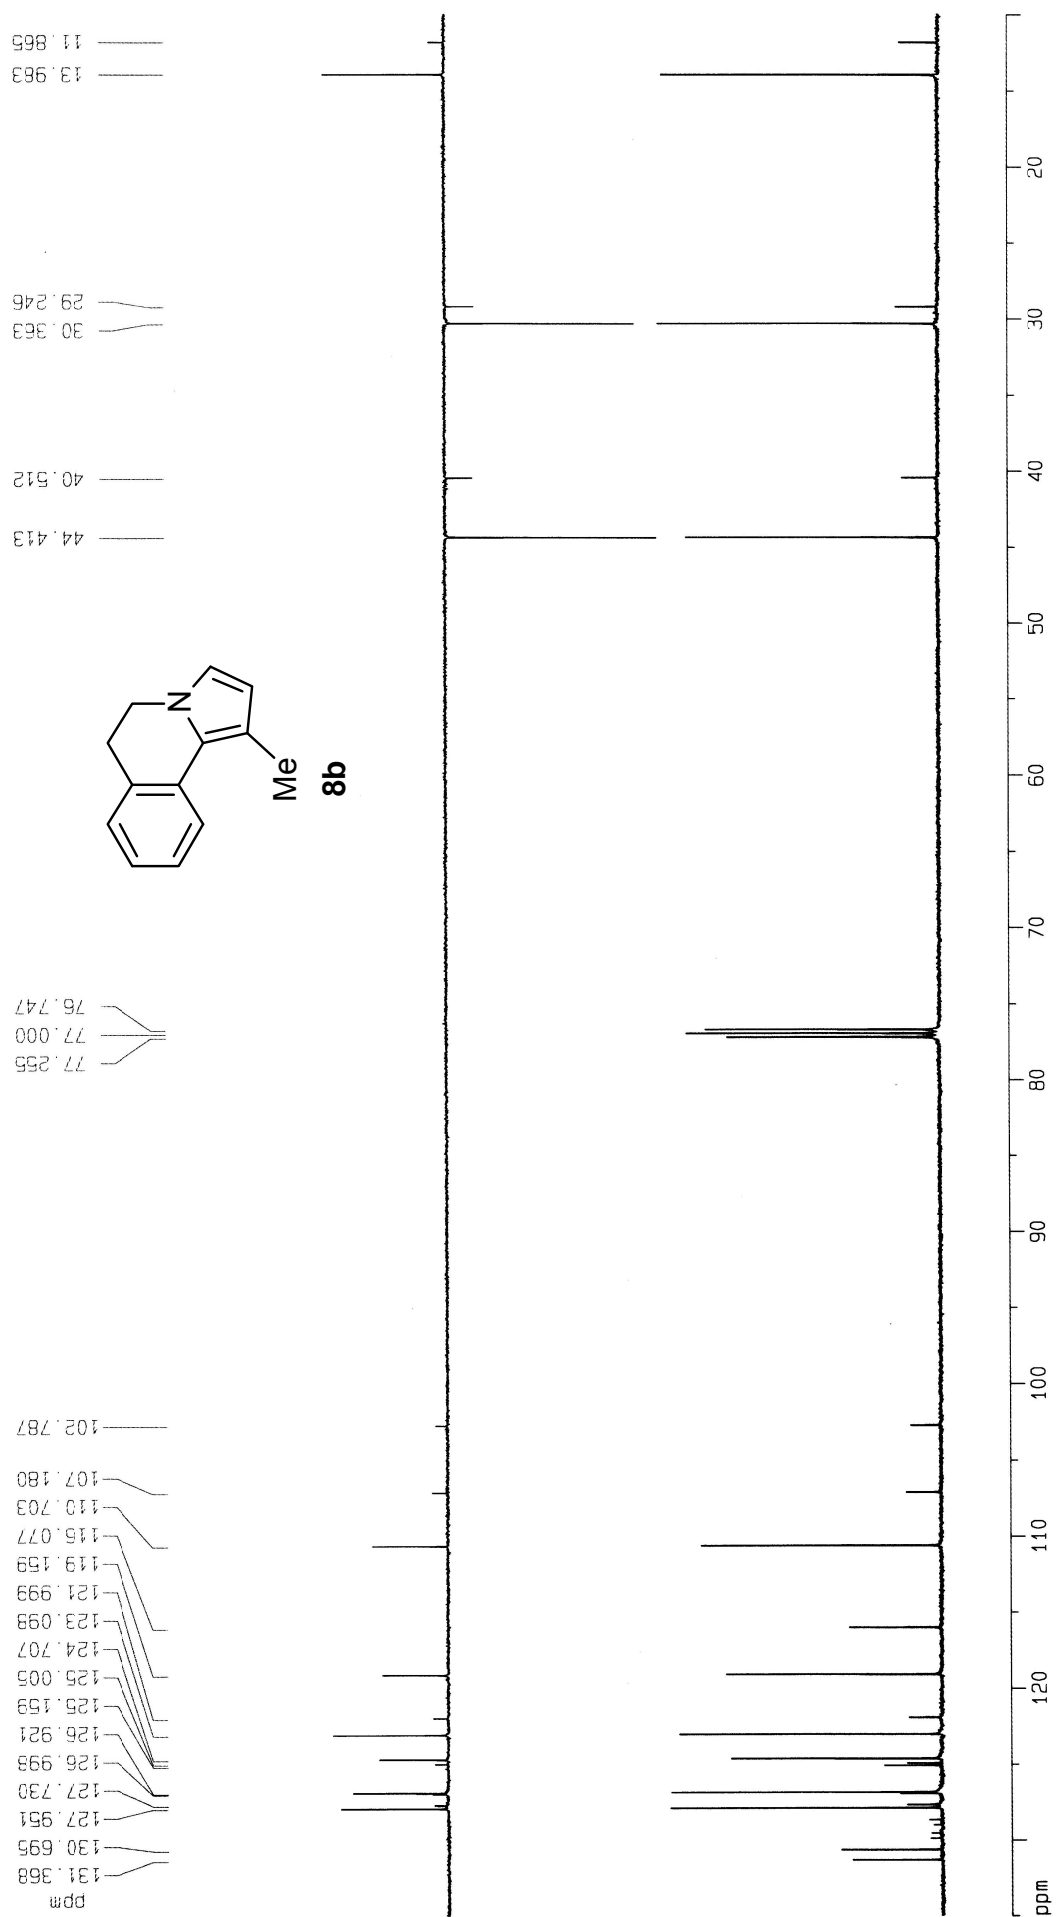

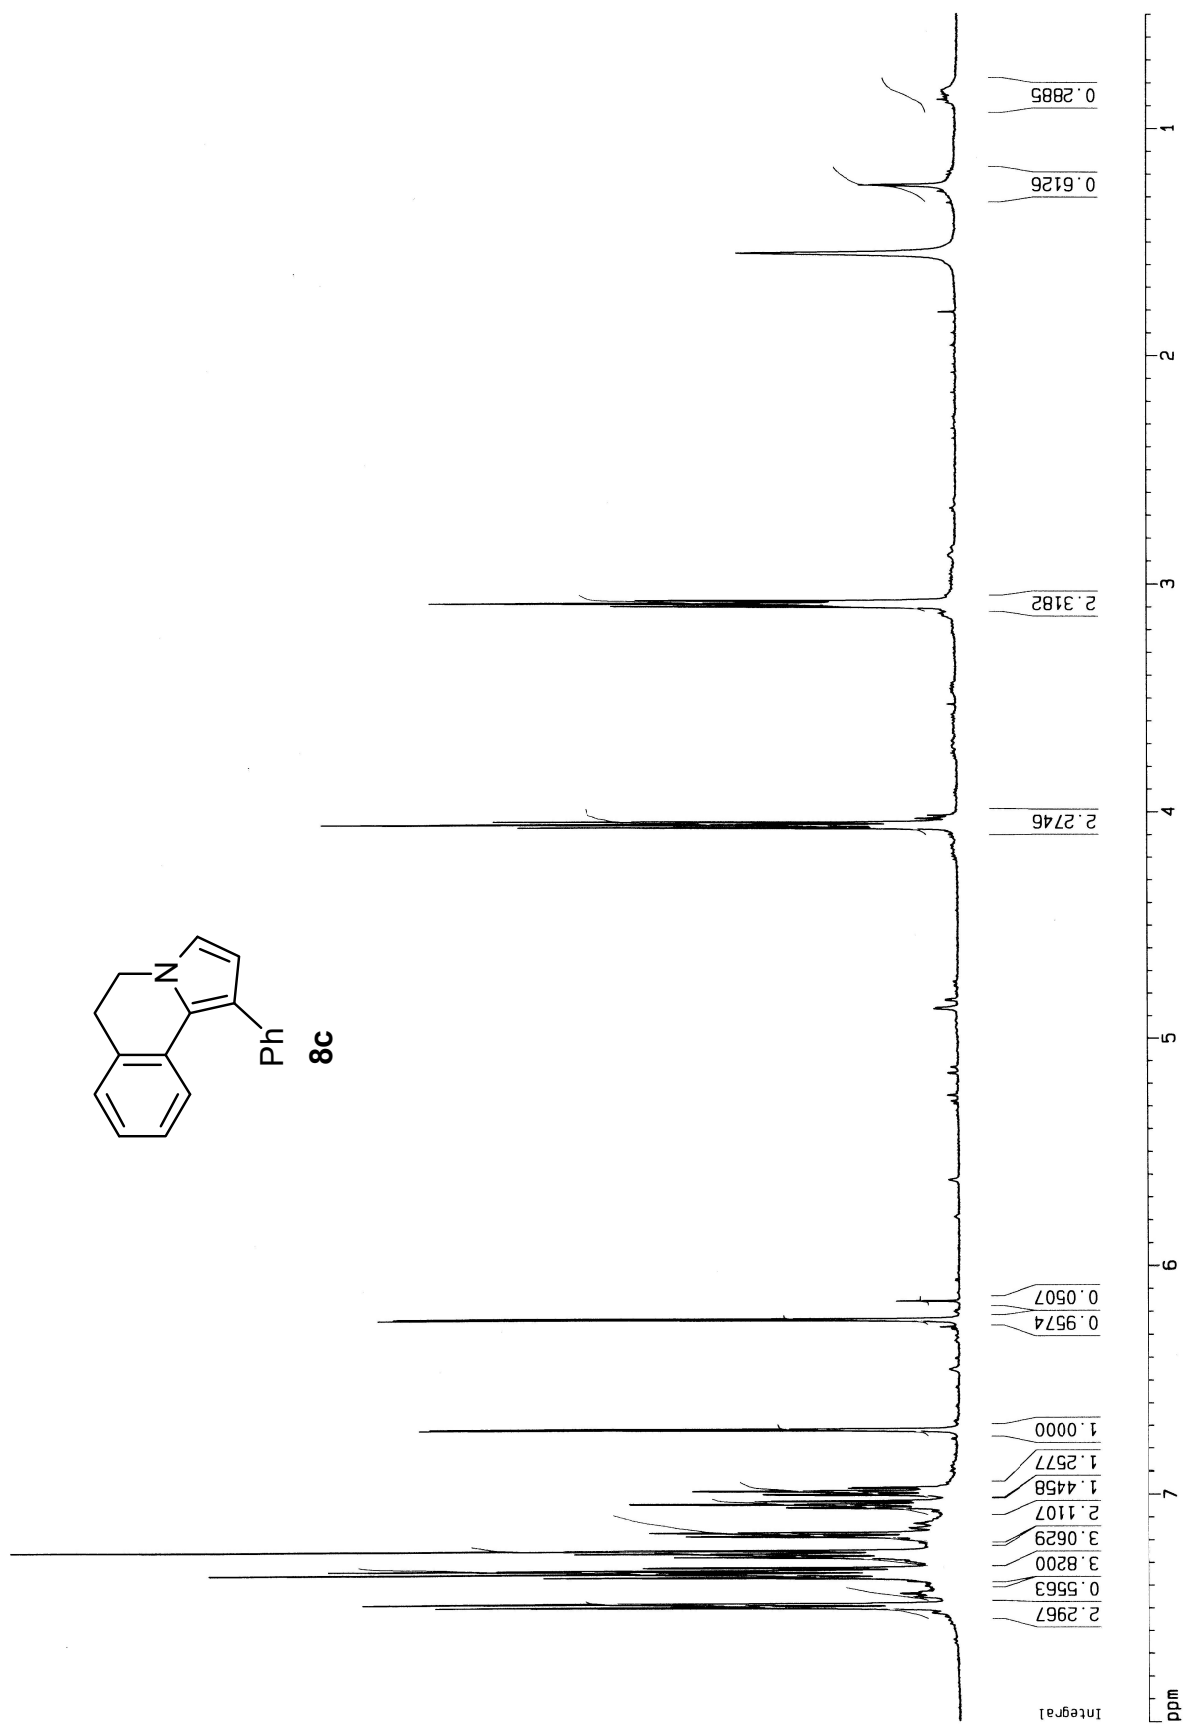

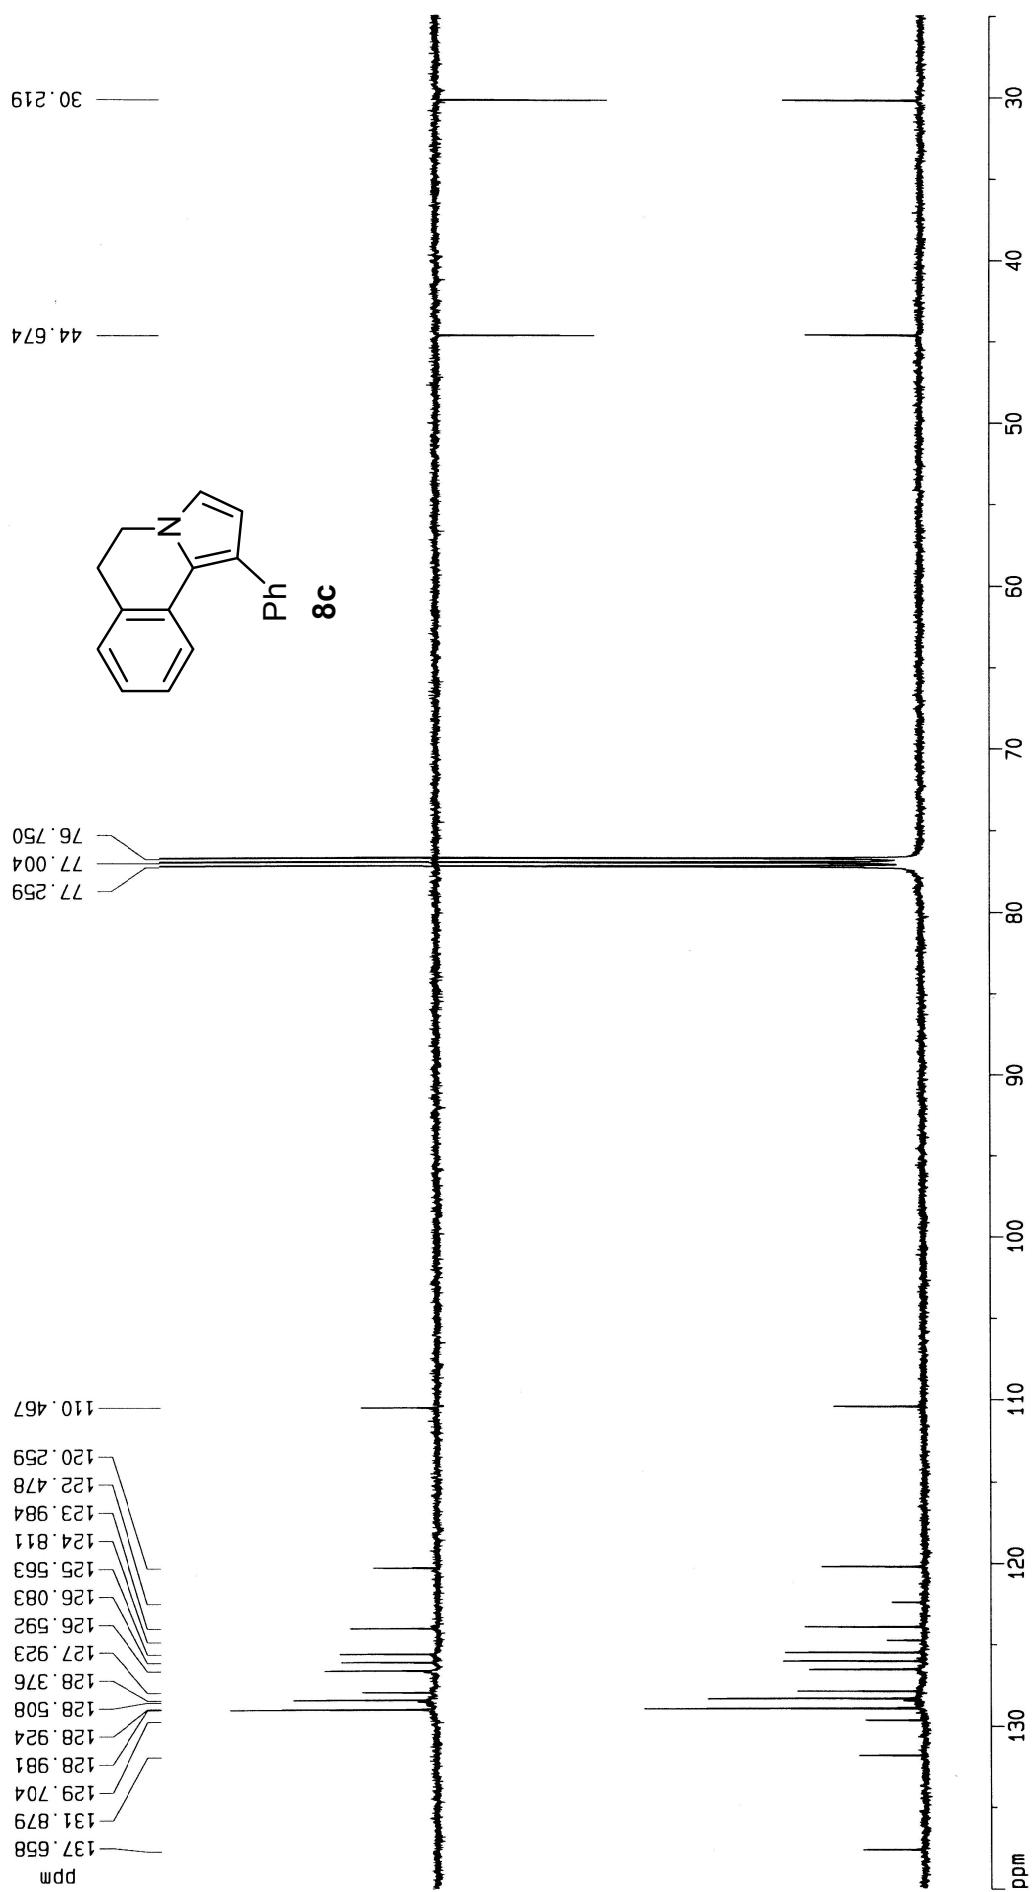



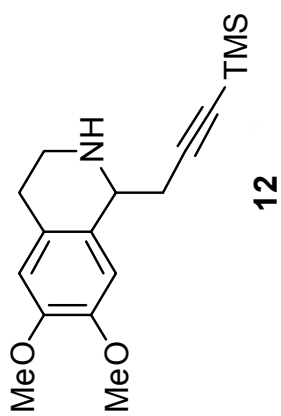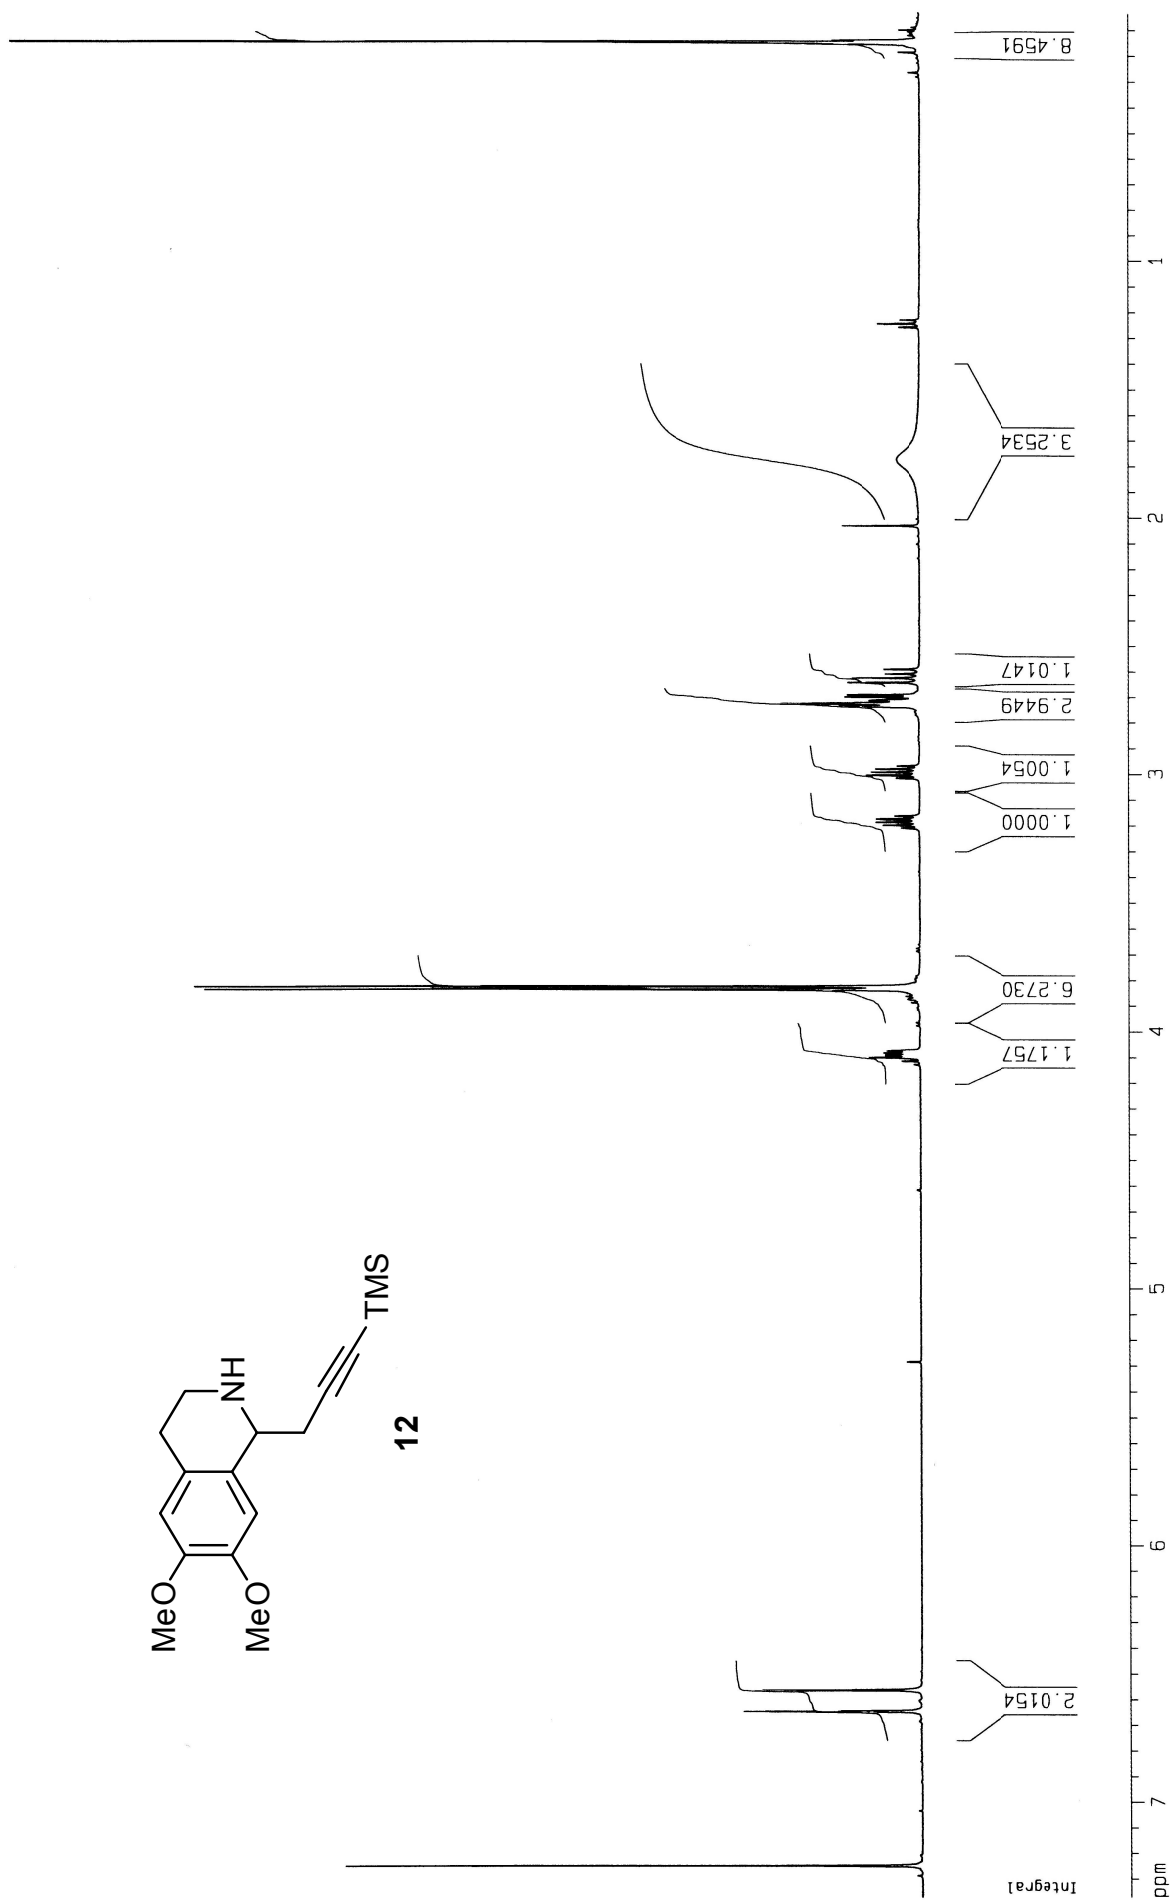

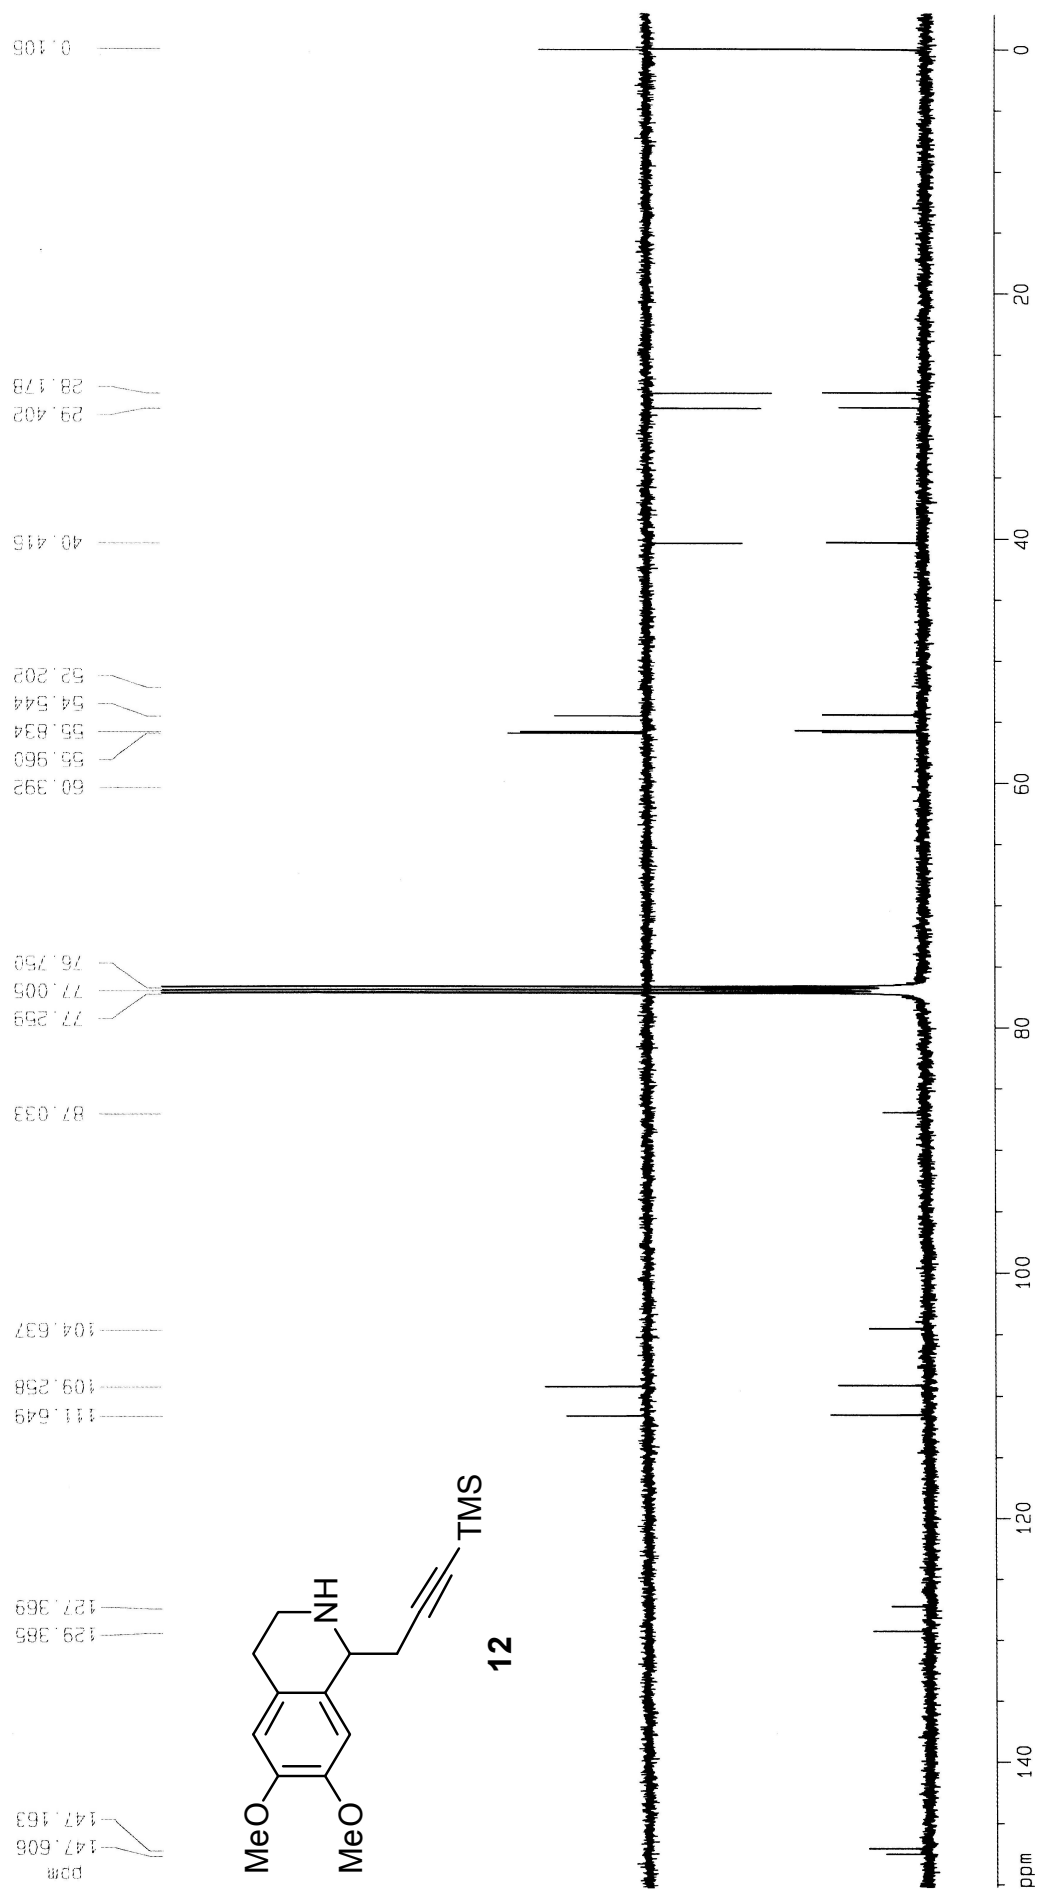

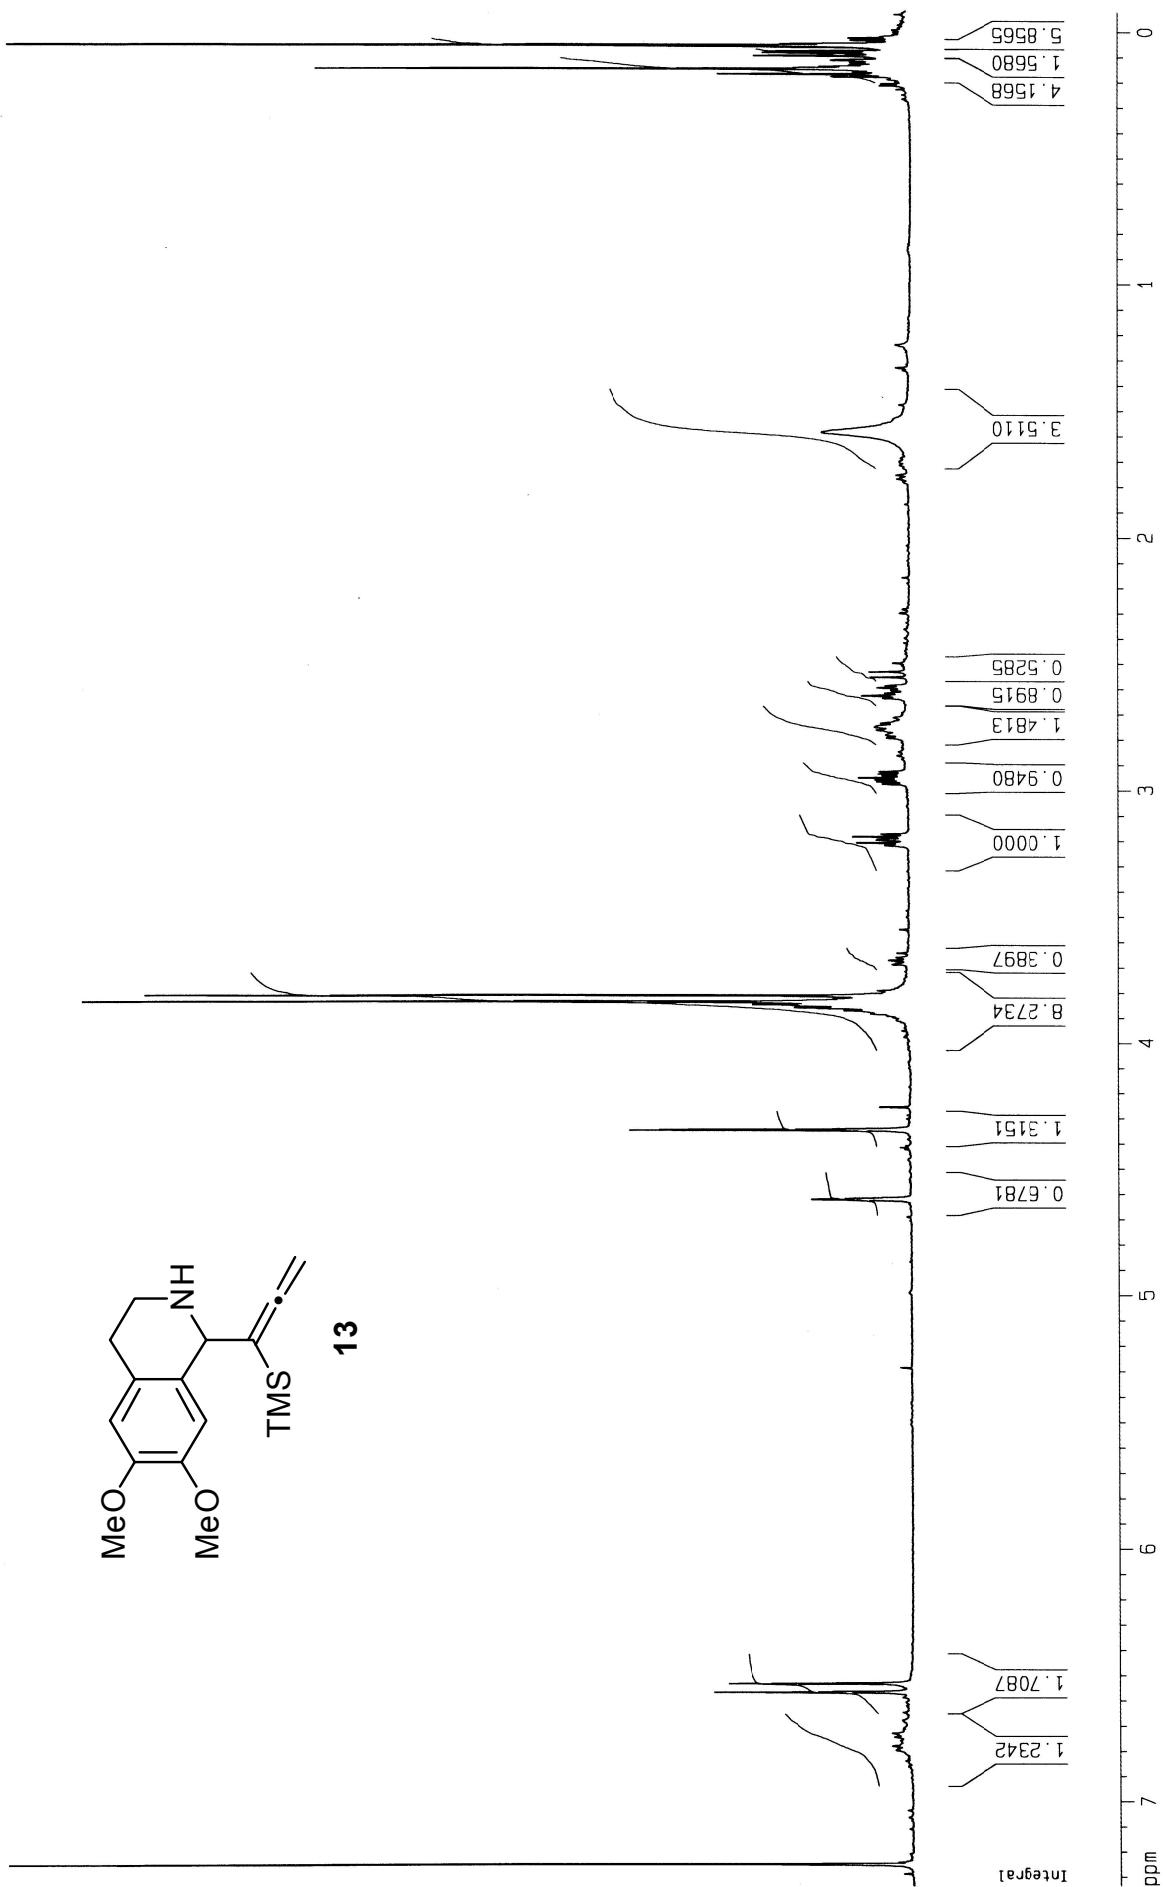

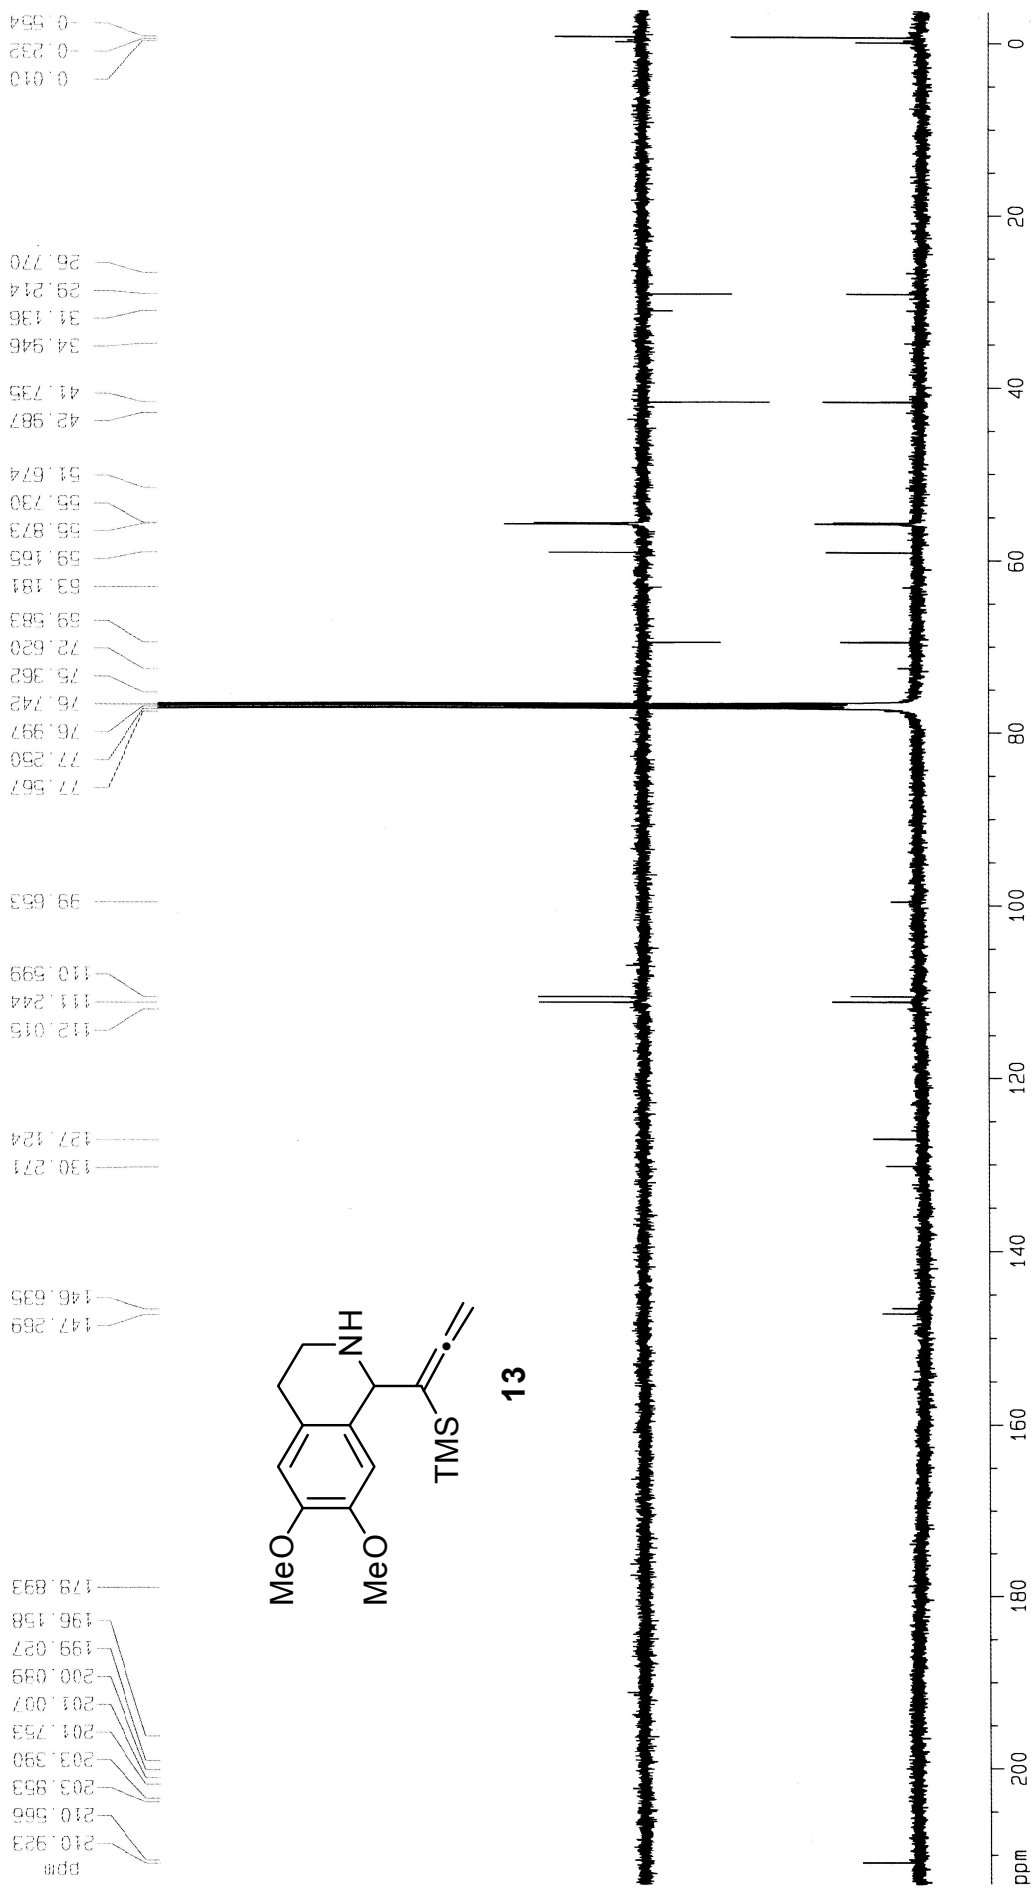

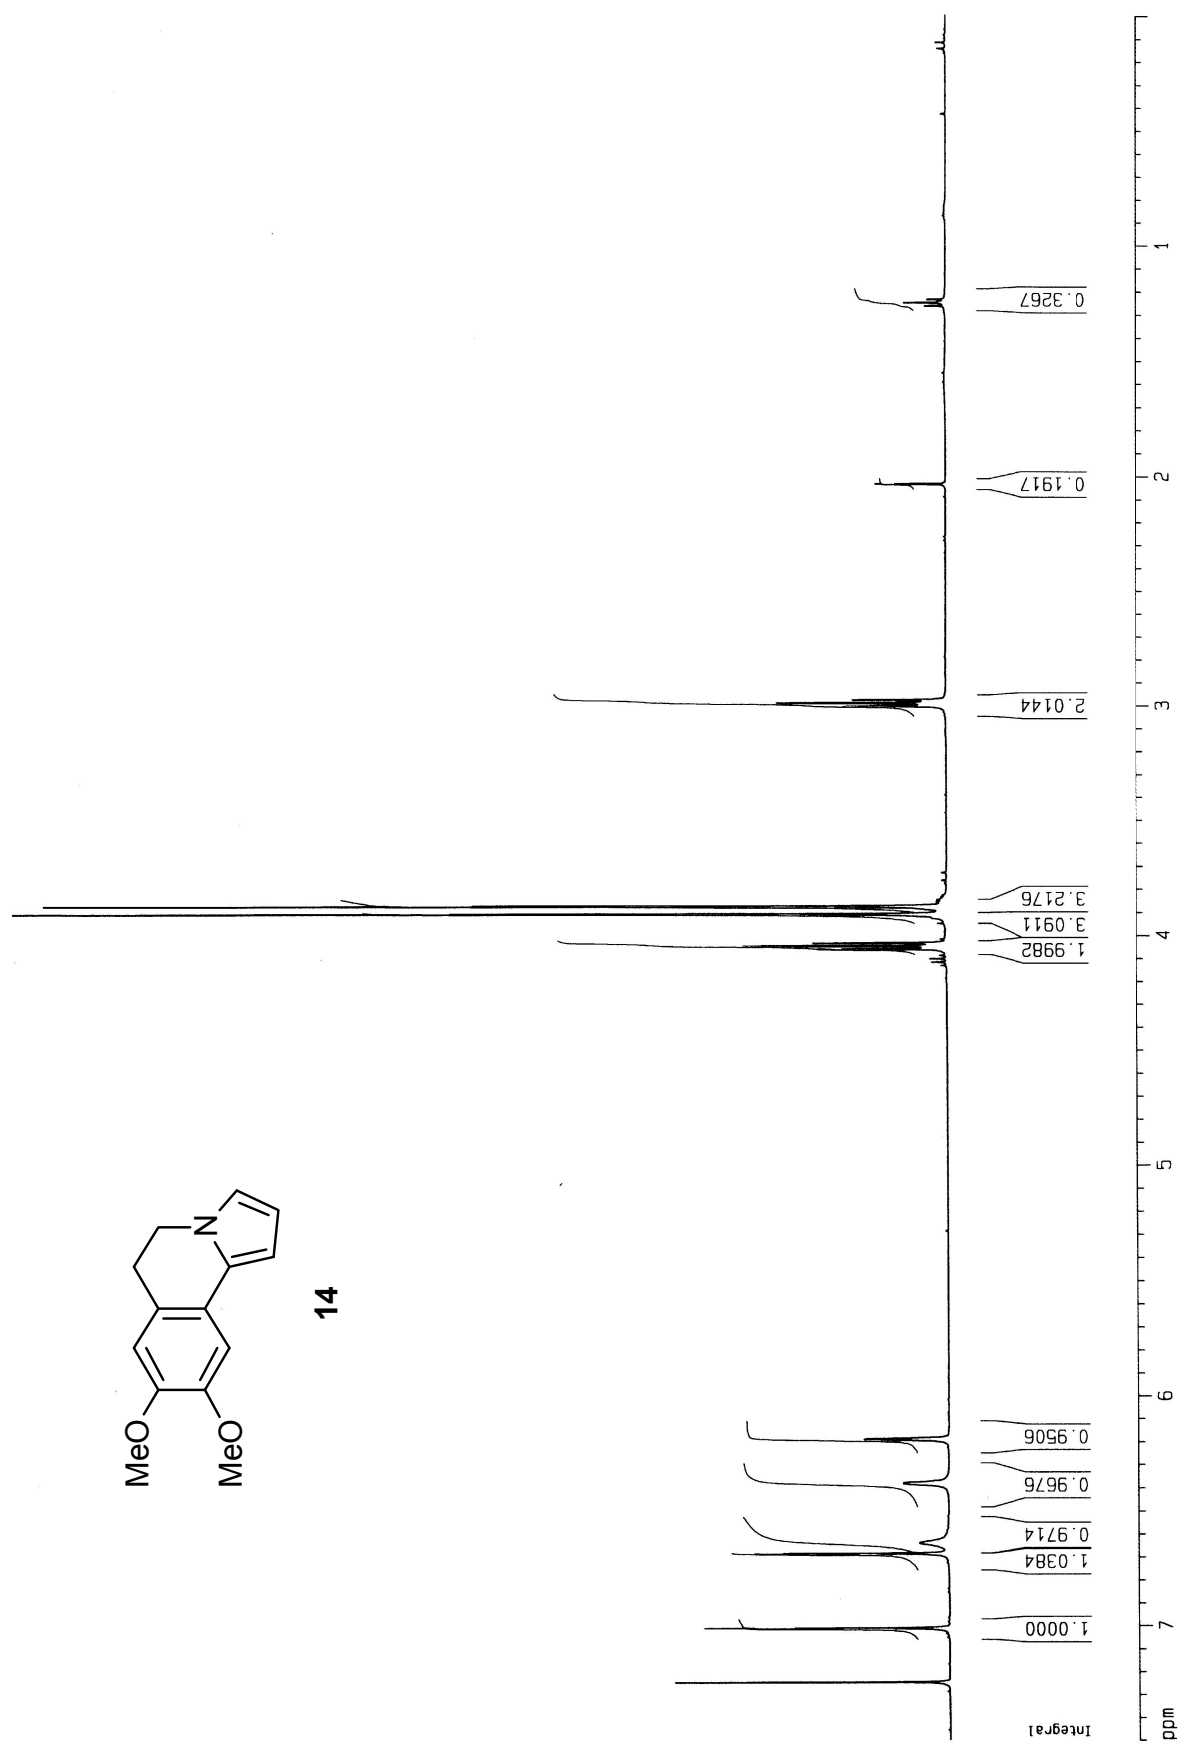

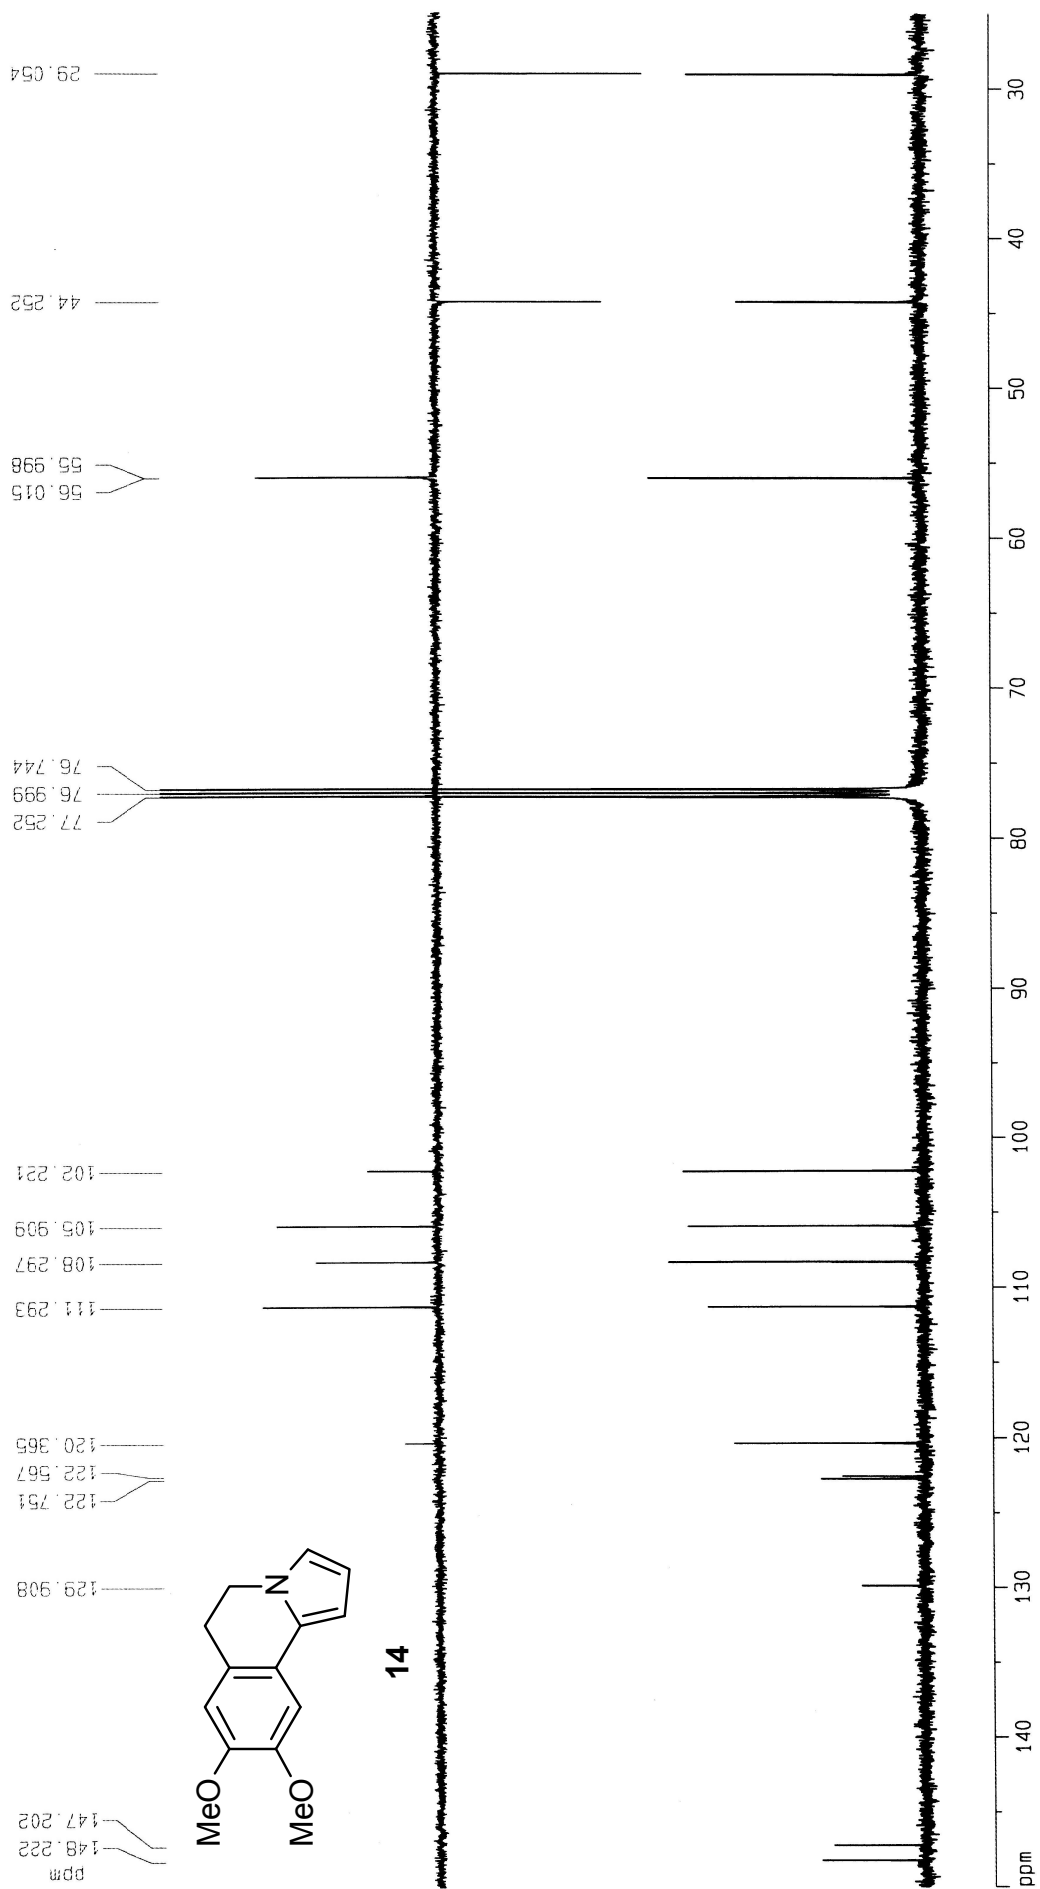

Supplement: c2ra22823h.pdf [file c2ra22823h.pdf]
